# 1 **Dual control of meiotic crossover patterning**

2 Stéphanie Durand<sup>1\*</sup>, Qichao Lian<sup>1\*</sup>, Juli Jing<sup>1\*</sup>, Marcel Ernst<sup>2</sup>, Mathilde Grelon<sup>3</sup>, David  
3 Zwicker<sup>2</sup> and Raphael Mercier<sup>1#</sup>

4 <sup>1</sup> Department of Chromosome Biology, Max Planck Institute for Plant Breeding Research,  
5 Carl-von-Linné-Weg 10, 50829 Cologne, Germany

6 <sup>2</sup> Max Planck Institute for Dynamics and Self-Organization, Am Faßberg 17, 37077 Göttingen,  
7 Germany

8 <sup>3</sup> Université Paris-Saclay, INRAE, AgroParisTech, Institut Jean-Pierre Bourgin (IJPB), 78000,  
9 Versailles, France

10

11 \* Contributed equally to this work

12 # corresponding author. [mercier@mpipz.mpg.de](mailto:mercier@mpipz.mpg.de)

13

14 Most meiotic crossovers (COs), called class I crossovers, are produced by a conserved pathway  
15 catalyzed by the ZMM proteins; COs are limited in number, typically to 1–3 per chromosome,  
16 and are prevented from occurring close to one other by crossover interference<sup>1-3</sup>. In many  
17 species, CO number is subject to dimorphism between males and females, and a lower CO  
18 number is associated with shorter chromosome axes and stronger interference<sup>4</sup>. How the  
19 patterning of COs is imposed, however, remains poorly understood. Here, we show that  
20 overexpression of the ZMM protein HEI10 increases COs and reduces crossover interference  
21 but maintains sexual dimorphism; shorter axes length in female meiosis is still associated with  
22 fewer COs and stronger interference than in male meiocytes. Disrupting the synaptonemal  
23 complex (SC) by mutating *ZYP1* also leads to an increase in class I COs but, in contrast,  
24 abolishes interference and disrupts the link between chromosome axis length and COs, with  
25 female and male meiocytes having the same CO frequency despite different axis lengths.  
26 Combining HEI10 overexpression and *zyp1* mutation leads to a massive increase in class I COs  
27 and absence of interference, while axes lengths are still unaffected. These observations support,

28 and can be effectively predicted by, a recently proposed coarsening model<sup>5,6</sup> in which HEI10  
29 diffusion is funneled by the central element of the SC before coarsening into large, well-spaced  
30 CO-promoting droplets. Given the conservation of the components, this model may account  
31 for CO patterning in many eukaryotes.

## 32 **Introduction**

33 A hallmark of sexual reproduction is the shuffling of homologous chromosomes by  
34 meiotic crossovers (COs). COs are produced by the repair of DNA double-strand breaks  
35 through two biochemical pathways: Class I COs are produced by a meiotic-specific pathway  
36 catalyzed by the ZMM proteins (*Saccharomyces cerevisiae* Zip1-4, Msh4-5, and Mer3) and  
37 represent most COs; Class II COs originate from a minor pathway that uses structure-specific  
38 DNA nucleases also implicated in DNA repair in somatic cells. Despite a vast excess of initial  
39 double-strand breaks, the number of resulting COs is limited, typically to one to three per  
40 chromosome pair. Class I COs are subject to additional tight constraints: At least one class I  
41 CO occurs per chromosome pair at each meiosis, the so-called obligate CO that ensures  
42 balanced chromosome distribution. Class I COs are also prevented from occurring next to each  
43 other on the same chromosome, a phenomenon called crossover interference. How this  
44 interference is achieved mechanistically has been debated for over a century<sup>1,3,7-9</sup>.

45 One specific unresolved question is the role of the synaptonemal complex (SC) in crossover  
46 interference. The SC is a zipper-like tripartite structure composed of two lateral chromosome  
47 axes, along which arrays of chromatin loops of each of the two homologous chromosomes are  
48 anchored, and a central part consisting of transverse filaments that connect the axes all along  
49 their length at meiotic prophase. Assessing the role of the SC in interference is difficult,  
50 because in many organisms the transverse filament protein is essential for the formation of  
51 class I COs<sup>2</sup>. One notable exception is *Arabidopsis thaliana*, where the transverse filament  
52 protein is not required for class I CO formation, providing a unique opportunity to analyze the  
53 role of the SC in CO patterning. In the *zyp1* mutant, class I COs form at a higher frequency  
54 than wild type and completely lack interference, demonstrating that the central element of the  
55 SC is, directly or indirectly, essential for imposing CO interference in *Arabidopsis*<sup>10,11</sup>.  
56 Reduced expression of the transverse element in *C. elegans* and specific mutations of the SC  
57 component that uncouple SC and CO formation in budding yeast lead to a reduction of  
58 interference, supporting a conserved role of the SC in imposing interference<sup>12-15</sup>. Interestingly

59 in some species, such as humans or Arabidopsis, CO number differs in males and females. This  
60 heterochiasmy correlates with axis/SC length, with the number of COs proportional to axis  
61 length<sup>4,16,17</sup>. CO interference appears to propagate at a similar axis/SC distance ( $\mu\text{m}$ ) in both  
62 sexes, which means that interference acts over greater genomic ranges (DNA) in the sex with  
63 a shorter axis/SC<sup>17,18</sup>, an observation which shows that the relevant space for the mechanism  
64 of interference is the axis/SC length.

65 A model was recently elaborated to account for class I CO patterning and interference,  
66 based on diffusion of the ZMM protein HEI10 (ZHP-3/4 in *C.elegans*) within the SC and a  
67 coarsening process leading to well-spaced CO-promoting HEI10 droplets<sup>5,6</sup>. HEI10, which  
68 encodes an E3 ubiquitin ligase, initially forms multiple small foci along the SC and is  
69 progressively consolidated into a small number of large condensates that co-localize with CO  
70 sites in diverse species<sup>19-22</sup>. Further, as predicted by the model, CO numbers depend on HEI10  
71 dosage in Arabidopsis<sup>6,23</sup>. Interference is abolished in the absence of the transverse element of  
72 the synaptonemal complex ZYP1<sup>10,11</sup>, which is compatible with the idea that diffusion of  
73 HEI10 along the central part of the SC underlies crossover patterning and interference.

74 Here, we explored the mechanisms of CO patterning in Arabidopsis by analyzing the  
75 combinatorial effects of axis/SC length (male vs. female), modification of HEI10 dosage, and  
76 disruption of the SC on COs. We notably show that overexpressing HEI10 in *zyp1* completely  
77 deregulates class I COs, with a massive increase of their number in both females and males.  
78 Our results support the model in which HEI10 coarsening by diffusion along the central  
79 element of the SC mediates CO patterning and imposes CO interference.

## 80 **Results and discussion:**

81 To decipher CO control, we studied the number and distribution of COs in both female  
82 and male meiosis when overexpressing HEI10 (well-characterized C2 line<sup>23</sup>), in the absence of  
83 the synaptonemal complex (*zyp1*), and in combination. We measured the number of class I  
84 COs in meiocytes by counting the number of MLH1-HEI10 co-foci at diplotene. In the pure  
85 line Col we analyzed six genotypes: wild type and *zyp1-1* combined with three dosages or  
86 HEI10 (wild type, heterozygous or homozygous for the HEI10<sup>oc</sup> C2 transgene). In the Col/*Ler*  
87 F1 hybrid, we analyzed four genotypes: wild type and *zyp1-1/zyp1-6* combined with two  
88 dosages of HEI10 (wild type and heterozygous for the C2 HEI10 transgene) (Figure 1A-B).  
89 The four hybrid genotypes were also used to characterize the crossover number and distribution

90 by sequencing populations derived from female and male crosses to Col (Figure 1C–F, Figure  
91 2, Figure S1–4).

## 92 **Overexpression of HEI10 increases COs but maintains heterochiasmy**

93 In wild types, the number of MLH1 foci is higher in males than females in both the  
94 inbreds and the hybrids (ratio male/female=1.8 and 1.6, respectively. Figure 1A–B). Whole-  
95 genome sequencing of male- and female-derived hybrid progenies showed that CO numbers  
96 detected genetically are higher in male meiosis than in female meiosis (Figure 1D, ratio=1.6,  
97  $p < 0.001$ ), confirming heterochiasmy. The number of MLH1 foci at male meiosis is higher in  
98 wild-type Col than in Col/Ler. Analysis of quantitative trait loci (QTL) in a Col/Ler population  
99 previously revealed that the Col *HEI10* allele is associated with higher recombination levels,  
100 suggesting that at least a part of this difference in MLH1 counts can be attributed to a difference  
101 in HEI10 activity<sup>23</sup>. In wild-type female, the MLH1 foci numbers are not significantly different  
102 between Col and Col/Ler and close to the minimum of one per chromosome (7.2 and 6.8 foci  
103 for five chromosomes). In the presence of a transgene ectopically overexpressing HEI10  
104 (HEI10<sup>oe</sup> C2 line<sup>23</sup>, homozygous), the number of MLH1 is increased ~two-fold in both sexes,  
105 in both Col and Col/Ler. Heterozygosity for the HEI10<sup>oe</sup> transgene also increases MLH1 foci  
106 number, but slightly less than homozygosity, confirming the effect of HEI10 dosage on  
107 recombination<sup>6,23</sup> and suggesting that the level of HEI10 in the C2 line is close to saturation.  
108 Importantly, increases provoked by HEI10 dosage modulation are similar in males and females,  
109 leading to more MLH1 in males than females ( $p = 0.0001$ ) (Figure 1B). This was confirmed  
110 with progeny sequencing in hybrids, which revealed a 2.1-fold increase of COs in HEI10<sup>oe</sup>  
111 female and male, compared with wild type ( $p < 2.2e-16$ , Figure 1D-F). The ratio of male vs.  
112 female COs is maintained at 1.6 in HEI10<sup>oe</sup> ( $p < 2.2e-16$ ). In summary, overexpressing HEI10  
113 provokes a doubling of class I COs in both female and male, maintaining heterochiasmy.

## 114 **ZYP1 mutation increases COs and abolishes heterochiasmy**

115 Mutating the transverse element of the SC ZYP1 also increases MLH1 foci number (Figure  
116 1B). In Col *zyp1*, compared to wild type, the numbers increased 1.4-fold in males, consistent  
117 with previous findings<sup>10,11</sup>, and 2.3-fold in females. In the Col/Ler hybrid, the numbers  
118 increased by 1.2-fold in male and 1.8-fold in females. In contrast to HEI10<sup>oe</sup>, MLH1 foci  
119 number is no longer significantly different in males versus females ( $p > 0.6$ ). This is consistent  
120 with genetic crossovers detected by sequencing of hybrid progenies with equal numbers

121 observed in female and male gametes and fold increases of 2.3 in females and 1.5 in males  
122 compared to wild type (Figure 1D)<sup>11</sup>. The *zyp1* mutation thus leads to an increase in class I  
123 COs, which disproportionately affects female meiosis and abolishes heterochiasmy.

#### 124 **Combining HEI10 overexpression and *zyp1* massively increases class I COs.**

125 HEI10<sup>oe</sup> and *zyp1* increase CO number, but in different ways; while the former maintains  
126 heterochiasmy, the latter does not. We thus combined *zyp1* mutation and HEI10<sup>oe</sup> and analyzed  
127 the effects on MLH1 foci numbers (Figure 1A–B). In Col, the number of foci observed in *zyp1*  
128 mutants homozygous for the HEI10<sup>oe</sup> transgene was significantly higher than ever previously  
129 reported, reaching 47.8 and 45.0 in females and males, respectively. The female and male  
130 MLH1 counts are not significantly different from each other and represent marked 6.7-fold and  
131 3.5-fold increases compared to their respective wild types. In Col *zyp1* males heterozygous for  
132 HEI10<sup>oe</sup>, the MLH1 foci count was slightly but significantly lower (41.1,  $p=0.015$ ) than the  
133 homozygous, showing that there is a dynamic range of HEI10 dosage effects on COs. In the  
134 hybrid *zyp1* HEI10<sup>oe</sup>, the observed number of MLH1 in females and males was 29.8 and 30.0,  
135 not significantly different from each other ( $p=0.8$ ) but representing a 4.4- and 2.9-fold increase  
136 compared to their wild-type controls. This suggests that class I COs are massively increased in  
137 *zyp1* mutants overexpressing HEI10. Indeed, progeny sequencing showed that the number of  
138 genetic COs in male *zyp1* HEI10<sup>oe</sup> was dramatically increased compared to wild type, reaching  
139 14.7 CO per gamete (3.1-fold, Mann-Whitney test,  $p < 2.2e-16$ , Figure 1D–F), fitting well with  
140 the 30 MLH1 foci counted in male meiocytes (Figure 1B). In females, COs were also vastly  
141 increased, but intriguingly, to even higher levels than predicted by the number of MLH1 foci  
142 ( $30/2=15$ ), reaching a striking 19.6 COs per female gamete (6.4-fold/wild type,  $p < 2.2e-16$ ,  
143 Figure 1D–F). Together, this shows that combining *zyp1* mutation and HEI10 overexpression  
144 cumulatively and massively increases the numbers of class I COs. It also suggests that class II  
145 COs may also be increased in female *zyp1* HEI10<sup>oe</sup>. Such an increase in class I COs is  
146 unprecedented, and suggests that the central element of the SC and HEI10 levels are two main  
147 regulators limiting class I COs.

148 Looking along chromosomes, *zyp1* and HEI10<sup>oe</sup> individually or in combination elicit a massive  
149 increase in COs along the arms while the peri-centromeres and the Col/*Ler* large inversion<sup>24,25</sup>  
150 remained recalcitrant to recombination (Figure 2, Figure S3). At the fine scale, the majority of  
151 COs were located in genic regions in both wild type and mutants (Figure S4). This suggests  
152 that despite a large increase in CO number, the local preference for CO placement is conserved,

153 presumably because the distribution of double-strand breaks is maintained. For all eight hybrid  
154 populations, the average observed number of COs is positively correlated with the physical  
155 size of chromosomes (Pearson's correlation coefficients  $>0.8$ , Figure 1E). We looked for co-  
156 variation of CO frequency between chromosomes within the same meiocyte/gamete, as  
157 observed in various species<sup>26</sup>. No significant correlation was seen in any of the populations,  
158 with maximum correlation coefficients of  $\sim 0.2$  observed in female *zyp1* HEI10<sup>oe</sup> (Figure S2),  
159 suggesting that this co-variation does not exist in Arabidopsis or is too small to be detected in  
160 our essay.

### 161 **CO interference is reduced by HEI10 overexpression and abolished in *zyp1***

162 To measure the impact of *zyp1* and HEI10<sup>oe</sup> on CO interference, we first analyzed the  
163 distribution of distances between two genetically detected COs for chromosomes with exactly  
164 two COs in female and male gametes (Figure 2). In wild-type females and males, the  
165 distribution was significantly shifted to large inter-CO distances ( $p < 10^{-6}$ ) compared with the  
166 expected distribution if the COs were randomly spaced, showing the presence of CO  
167 interference (Figure 2C). In HEI10<sup>oe</sup> females and males, the distribution was also shifted to  
168 longer distances, showing the presence of CO interference in both sexes ( $p < 10^{-4}$ , Figure 2D).  
169 However, the shift was less marked than in the wild type, suggesting a reduction of interference  
170 in HEI10<sup>oe</sup>. In *zyp1* and *zyp1* HEI10<sup>oe</sup>, the observed distributions of inter-CO distances were  
171 not different from what would be expected in the case of random spacing ( $p > 0.2$ , Figure 2E–  
172 F), suggesting an abolition of CO interference in both females and males. Furthermore, we  
173 performed a coefficient of coincidence (CoC curve) analysis for an alternative, likely more  
174 accurate, measurement of CO interference (Figure 2G–J)<sup>9</sup>. In wild type, the two CoC curves  
175 are below 1 at distances  $< \sim 15$  Mb in both females and males, confirming the presence of  
176 substantial CO interference (Figure 2G). The female curve stays close to 0 for longer distances,  
177 showing that CO interference propagates to longer Mb distances in females, consistent with  
178 previous analyses<sup>11,16,18</sup>. In HEI10<sup>oe</sup>, the curves also deviate from 1 at short distances ( $< \sim 7$  Mb),  
179 showing the presence of interference, although at a reduced level compared to wild type (Figure  
180 2H). As in wild type, interference in HEI10<sup>oe</sup> is stronger in female than in male meiosis. In  
181 contrast, the CoC curves are flat at values close to 1 for both females and males in *zyp1* (Figure  
182 2I), confirming that CO interference is abolished in the absence of ZYP1<sup>10,11</sup>. In *zyp1* HEI10<sup>oe</sup>,  
183 the curves are also flat at  $\sim 1$ , showing that the numerous class I COs produced in this context

184 do not interfere with each other (Figure 2J). Thus, HEI10<sup>oe</sup> reduces, while *zyp1* abolishes CO  
185 interference.

### 186 **High CO rates in *zyp1* and HEI10<sup>oe</sup> are not associated with meiotic defects**

187 The limited level of COs per chromosome observed in most eukaryotes could suggest that a  
188 high level of COs has a detrimental effect. We explored if a massive elevation of class I COs  
189 is associated with meiotic chromosome segregation and fertility defects. The number of seeds  
190 per fruit is reduced in *zyp1-1* compared to wild type (-8%, t-test  $p < 0.001$ ), consistent with  
191 previous results and the reported loss of the obligate CO in *zyp1* mutants<sup>10,11</sup> (Figure 3I).  
192 Analyses based on sequence coverage detected a few aneuploids among *zyp1* gametes (2/497,  
193 Figure 3J and S6–7) that were not detected in hybrid wild types (0/427 in this study, and 0/760  
194 in an independent wild-type dataset<sup>27</sup>). The HEI10<sup>oe</sup> C2 line also showed a slight reduction of  
195 fertility (-12%,  $p = 0.005$ , Figure 3I) and low frequency of aneuploid gametes (2/285). In *zyp1*  
196 HEI10<sup>oe</sup>, seed number was reduced (-7%,  $p = 0.025$ ), and a small number of aneuploids were  
197 detected in hybrids (7/272), suggesting a slight meiotic defect also in this background. All the  
198 11 identified trisomy cases concerned chromosome 4, the shortest Arabidopsis chromosome.  
199 The centromeric region of chromosome 4 of the aneuploid gamete is systematically  
200 heterozygous *Col/Ler*, which is diagnostic for missegregation at meiosis I (failure to separate  
201 homologous chromosomes). For the vast majority (9/11), no CO was detected on the aneuploid  
202 chromosome, which is compatible with an absence of COs in the bivalent. This suggests that  
203 these nine events resulted from the loss of the obligate crossover and consequent random  
204 missegregation of homologs. Two aneuploids, both from *zyp1* HEI10<sup>oe</sup>, had two COs on the  
205 trisomic chromosome. In both cases, the two COs are relatively close to each other (~2 and 4  
206 Mb), which may lead to an unstable connection between the homologs as spindle tension would  
207 be counteracted by only a short stretch of cohesion. The aneuploidies appear thus to be  
208 associated with the absence of COs or specific configurations of a pair of COs. Meiotic  
209 chromosome spreads in *zyp1* HEI10<sup>oe</sup> showed that most metaphase I cells had a wild-type  
210 configuration with five bivalents aligned on the metaphase plate (44/45 in *Col*; 23/30 in  
211 *Col/Ler*; Figure 3C). However, one univalent was observed in a minority of cells (1/45 and  
212 7/30, Figure 3C). Consistently, at metaphase II almost all cells had five chromosomes aligned  
213 on the two plates (25/25 and 6/7; Figure 3D), and one had a 6:4 configuration indicating  
214 unbalanced segregation at meiosis I (Figure E, F), likely due to the absence of the obligate CO.  
215 Altogether, this shows that a slight meiotic chromosome segregation defect is present in

216 HEI10<sup>oe</sup> *zyp1*. However, the rare missegregations appear to be due to an incomplete CO  
217 assurance and are not associated with the extreme CO numbers observed in the mutants (up to  
218 15 COs in a single chromatid, Table S4). This suggests that high CO number does not impair  
219 chromosome segregation and raises the question of the evolutionary forces that limit CO to  
220 typically less than three per chromosome per meiosis in most eukaryotes<sup>1,28</sup>. While failure to  
221 insure at least one CO per chromosome pair is associated with meiotic failure in most  
222 eukaryotes, the reasons that prevent high CO number are unclear. The absence of an immediate  
223 cost of massively elevated CO numbers in HEI10<sup>oe</sup> *zyp1* suggests that low CO numbers are not  
224 selected for by evolution because of mechanical constraints during meiosis. Rather, this  
225 observation suggests that the medium-to-long term genetic effects of COs are subject to indirect  
226 selection<sup>1</sup>. This supports the suggestion that a relatively low recombination rate, not much  
227 higher than one per chromosome, is optimal for adaptation.

#### 228 **Female and male SC lengths differ and are affected by neither HEI10<sup>oe</sup> nor *zyp1***

229 SC length has been shown to correlate with the frequency of class I COs<sup>4,16,17</sup>. We wondered if  
230 the class I CO increase provoked by *zyp1* and HEI10<sup>oe</sup> is associated with variation in SC length.  
231 We traced chromosome axis (REC8) in female and male meiocytes with preserved 3D  
232 organization and measured the length of each chromosome (Figure 4, Table S5). In wild type,  
233 we found that the SC is 1.6-fold longer in males than females, consistent with previous reports<sup>16</sup>  
234 (Figure 4M). The longer total SC length in wild-type males is proportional to the higher MLH1  
235 foci and CO numbers compared to females (Figure 1B, 1D, 4Q), suggesting that SC length  
236 determines CO number and thus drives heterochiasmy. Strikingly SC/axis absolute and relative  
237 length is conserved in both sexes in HEI10<sup>oe</sup>, *zyp1*, and *zyp1* HEI10<sup>oe</sup> mutants, thus maintaining  
238 the male-female dimorphism (Figure 4M). In HEI10<sup>oe</sup>, the MLH1 foci and CO numbers are  
239 increased proportionally in males and females, maintaining heterochiasmy (Figure 1B, 4O–Q).  
240 This suggests that the effect of HEI10 dosage on COs is constrained by the length of the SC.  
241 In clear contrast to HEI10<sup>oe</sup>, the link between axis length and CO number is disrupted in *zyp1*,  
242 with MLH1 foci and COs equal in males and females despite a large difference in axis length  
243 (4O–Q). The observation that the length of pairs of axes in *zyp1* matches the length of the  
244 assembled SC in the wild type suggests that the length of the two axes directly determines SC  
245 length. In the double mutant *zyp1* HEI10<sup>oe</sup>, MLH1 foci are massively increased and reach equal  
246 numbers in males and females despite different axis lengths that are unmodified compared to



247 wild type (Figure 4P). This suggests that HEI10 dosage has a comparable effect in males and  
248 females in the absence of the SC.

249 Altogether, this suggests that two major factors conjointly regulate CO number: (i) Our results  
250 show that the central element of the SC ZYP1 imposes interference and limits COs. The length  
251 of the axis/SC is correlated with the number of COs in various contexts<sup>4</sup>, and notably when  
252 comparing sexes. Crucially, this correlation is lost in the absence of ZYP1, where the difference  
253 in axis length is no longer associated with a difference in CO number, suggesting that COs are  
254 regulated by the length of the tripartite SC and thus indirectly by the axis. The upstream  
255 mechanisms that determine the differences in SC lengths in males and females in many  
256 organisms remain to be determined. (ii) HEI10 dosage positively regulated CO formation. The  
257 effect of HEI10 dosage appears to be constrained by the length of the SC. HEI10 initially loads  
258 as multiple foci along the SC before consolidating into a small number of large foci at CO  
259 sites<sup>19</sup>. This supports a model in which HEI10 loading on the SC depends conjointly on HEI10  
260 expression levels and SC length and that this loading eventually determines CO number.

### 261 **The HEI10 coarsening model**

262 The results we present here and previous observations can be interpreted in the context of an  
263 emerging model for crossover patterning via droplet coarsening through the diffusion of HEI10  
264 along the SC<sup>5,6</sup>. In this model (Figure 5), HEI10 initially forms multiple droplets along the SC,  
265 and HEI10 molecules diffuse along the SC from droplets to droplets. If larger droplets tend to  
266 retain more HEI10 molecules than smaller droplets, a coarsening process is initiated, and large  
267 droplets grow at the expense of nearby smaller droplets, leading to the formation of well-spaced  
268 large droplets. These large droplets are proposed to create a specific context that promotes class  
269 I CO formation (e.g., by attracting the MLH1/MLH3 complex) and protects recombination  
270 intermediates from anti-CO factors (i.e., FANCM and RECQ4<sup>29,30</sup>). It is unclear if initial  
271 droplets colocalize with recombination intermediates or if recombination intermediates favor  
272 the coarsening process locally, but both hypotheses envisage final droplets to embed such an  
273 intermediate. This model predicts the obligate crossover, a limited number of COs, and  
274 interference<sup>6</sup>. If the coarsening process can proceed without restrictions, it would ultimately  
275 lead to the formation of a single droplet/CO per bivalent, as observed in *C. elegans*<sup>5</sup>. However,  
276 in most species, including Arabidopsis, 2–3 interfering class I COs are typically observed per  
277 bivalent. At least three hypotheses can account for this observation: one proposes an upper  
278 limit in the size of a droplet, above which it stops growing, allowing other droplets to be

279 maintained. The second supposes that the coarsening is stopped when a checkpoint is satisfied  
280 (e.g., when a least one large droplet/one CO is formed per chromosome). The third suggests  
281 that the process is stopped before completion after a certain period, which we consider here for  
282 simplicity. In all cases, the total amount of HEI10 loaded onto the SC determines the number  
283 of CO-promoting droplets, although in the third case the length of the SC also plays a minor  
284 role independently of the total amount of HEI10. The model proposes that two factors jointly  
285 determine the initial HEI10 loading: (i) HEI10 concentration in the nucleoplasm, which  
286 determines the amount of HEI10 in initial droplets and on the SC per  $\mu\text{m}$  of SC (ii) the length  
287 of the SC, which, for a given expression level of HEI10 would determine linearly the total  
288 HEI10 loading. Our numerical implementation of this model (see Methods) explains the  
289 measured CO counts quantitatively (Figure 6A,B). In particular, it explains the observed  
290 correlation between the length of the SC and the number of COs between chromosome pairs  
291 within single cells as well as between different cells, as notably observed here in Arabidopsis,  
292 where female meiosis has a shorter SC and fewer COs than male meiosis. Note that this shorter  
293 SC in females also implies stronger CO interference (Figure 6C,F, G; compare with Figure 2).  
294 This model also accounts for the fact that CO number depends on HEI10 expression level, as  
295 this level determines the amount of HEI10 loaded per  $\mu\text{m}$  of SC. Remarkably, we observed  
296 that overexpressing HEI10 increases CO numbers in males and females without eliminating  
297 heterochiasmy, as predicted by the difference in SC length. In addition, CO interference is also  
298 reduced, but not abolished by over-expressing HEI10, as expected, as the coarsening process  
299 still occurs (Figure 6D,F,H, I). We propose that in the absence of SC, in the *zyp1* mutant, HEI10  
300 diffusion is no longer constrained to the SC but occurs freely in the nucleoplasm. In this case,  
301 droplets still form on chromosomes (Figure 1A-B), but they now exchange HEI10 directly with  
302 the nucleoplasm. If this exchange is slow compared to the duration of pachytene, all initial  
303 droplets grow continuously by taking up HEI10. In contrast, when HEI10 is exchanged more  
304 quickly, competition between droplets, and thus coarsening, will set in, which was also recently  
305 proposed<sup>31</sup>. In both cases, large HEI10 foci form, colocalize with MLH1, and promote class I  
306 COs. However, the obligate CO and CO interference are lost as the diffusion is no longer  
307 constrained per chromosome (Figure 6E,J). In a sense, in the absence of the SC, the coarsening  
308 and CO designation process can be said to be “blind” to chromosomes. The absence of the SC  
309 must be associated with slower coarsening since otherwise the exchange of HEI10 via the  
310 nucleoplasm would be significant in wild type, too. If the number of initial droplets in the *zyp1*  
311 mutant is roughly comparable to wild type, slower coarsening implies a bigger number of large  
312 droplets at the end of pachytene, consistent with the increase observed experimentally (Figure

313 1). Together with interference, heterochiasmy is abolished when the number of COs per  
314 chromosome is solely determined by HEI10 expression level in the nucleoplasm and no longer  
315 by HEI10 loading onto the SC. Taken together, the experimental data and the coarsening model  
316 show that two factors limit class I COs: ZYP1-mediated CO-interference and HEI10 levels.

317 A similar model was proposed and further supporting experimental data were recently obtained  
318 in *C. elegans*<sup>5</sup>. Several additional pieces of evidences suggest that the dual control of COs by  
319 SC and HEI10 is conserved: In multiple species, HEI10 homologs also initially form multiple  
320 foci before eventually consolidating into a limited number of large foci that co-localize with  
321 COs<sup>19-22,32</sup>; COs covary with SC length in many species<sup>4</sup>; Variants that affect recombination  
322 rates in natural populations of diverse species involve genes that encode HEI10 homologues<sup>33</sup>.  
323 This suggests that the coarsening of HEI10 along the SC may be a conserved process for CO  
324 patterning in eukaryotes.

## 325 **Materials and methods**

### 326 **Plant Materials and Growth Conditions**

327 *Arabidopsis thaliana* plants were cultivated in Polyklima growth chambers (16-h day, 21.5 °C,  
328 280 μM; 8-h night, 18 °C: 60% humidity). Wild-type Col-0 and *Ler*-1 are 186AV1B4 and  
329 213AV1B1 from the Versailles stock center (<http://publiclines.versailles.inra.fr/>). The *zyp1-1*  
330 (8.7.2V1T3) and *zyp1-6* (1.12V5T2) mutants were previously described<sup>11</sup>. The HEI10 over-  
331 expression line is Col HEI10 line C2<sup>23</sup>, kindly provided by Ian Henderson. Genotyping of the  
332 mutants was carried out by PCR amplification (Dataset S1).

333 To generate the double homozygous mutant *zyp1-1*<sup>-/-</sup> HEI10<sup>oe</sup> in Col, *zyp1-1*<sup>+/-</sup> plants were  
334 crossed with HEI10<sup>oe</sup> homozygous mutant plants (C2). The obtained double heterozygous  
335 *zyp1-1*<sup>+/-</sup> HEI10<sup>oe</sup> were selfed to produce *zyp1-1*<sup>-/-</sup> mutants, HEI10<sup>oe</sup> homozygous, and *zyp1-1*<sup>-/-</sup>  
336 HEI10<sup>oe</sup> double homozygous mutants. These sister plants were used to perform MLH1 foci  
337 counting, SC measurements, chromosome spreads, and seed countings. To generate *zyp1-*  
338 *1/zyp1-6* HEI10<sup>oe het</sup> in Col/*Ler*, double heterozygous *zyp1-1*<sup>+/-</sup> HEI10<sup>oe</sup> (Col) were crossed with  
339 *zyp1-6*<sup>+/-</sup> (*Ler*) to generate *zyp1-1/zyp1-6* HEI10<sup>oe het</sup>, HEI10<sup>oe het</sup>, *zyp1-1/zyp1-6* and wild-type  
340 controls in Col/*Ler*. These sister plants were used for MLH1 foci counting and SC length  
341 measurements and were reciprocally backcrossed with wild-type Col to generate the  
342 sequencing populations. Backcross populations were grown in the greenhouse for three weeks  
343 (16-h day/8-h night) and four days in the dark. For DNA extraction and library preparation,  
344 100–150mg leaf samples were collected from the four backcross populations<sup>34</sup>.

### 345 **Cytology**

346 Chromosome spreads and immunolocalization of male meiocytes on 3D slides were conducted  
347 as previously described<sup>35,11</sup>. For female 3D slides, 0.8–1.2mm pistils were collected and their  
348 stigmata cut off. Pistils were then fixed and digested following the same procedure as for male  
349 meiocytes. The pistils were then opened longitudinally and the ovules released on a slide. The  
350 subsequent slide treatment and immunolocalization were the same as for male meiocytes, and  
351 were described previously<sup>11</sup>.

352 Four primary antibodies were used: anti-REC8 raised in rat<sup>36</sup> (laboratory code PAK036,  
353 dilution 1:250), anti-MLH1 in rabbit<sup>37</sup> (PAK017, 1:200), anti-HEI10 in chicken<sup>19</sup> (PAK046,

354 1:5,000) and anti-ZYP1N in guinea pig<sup>11</sup> (PAK053, 1:500). Secondary antibodies were STAR  
355 RED, STAR ORANGE and STAR GREEN, or Alexa488. Super-resolution images were  
356 acquired with the Abberior instrument facility line (<https://abberior-instruments.com/>) 561-  
357 and 640-nm excitation lasers (for STAR Orange and STAR Red, respectively) and a 775-nm  
358 STED depletion laser. Confocal images were taken with the same instrument with a 485-nm  
359 excitation laser (for STAR GREEN/Alexa488).

### 360 **Image processing and analysis**

361 Deconvolution of the images was performed by Huygens Essential (version 21.10, Scientific  
362 Volume Imaging, <https://svi.nl/>) using the classic maximum likelihood estimation algorithm  
363 with lateral drift stabilization; signal-to-noise ratio: 7 for STED images and 20 for confocal  
364 images, 40 iterations, and quality threshold of 0.5. Maximum intensity projections and contrast  
365 adjustments were also done with Huygens Essential. Deconvoluted pictures were imported into  
366 Imaris 9.8 (<https://imaris.oxinst.com/>, Oxford Instruments, UK) for subsequent analysis.  
367 MLH1 foci were counted using the spots module in diplotene and diakinesis cells. The vast  
368 majority of MLH foci colocalize with a HEI10 focus. Only double MLH1/HEI10 foci present  
369 on chromosomes were taken into account. For REC8 signal tracing, fully synapsed cells were  
370 used to trace the chromosomes. In wild type and HEI10<sup>oe</sup>, the five synapsed bivalents were  
371 traced. In *zyp1* and *zyp1* HEI10<sup>oe</sup>, five pairs of parallel chromosomes were traced. The surface  
372 module was used to create a clean masked REC8 channel for filament tracing. The filament  
373 module was used to trace the SC length, AutoDepth function was used to do semi-automatic  
374 tracing and get the simulated chromosome. The SC length of each chromosome was measured  
375 using the statistics function of the Filament module.

### 376 **CO identification and analysis**

377 In this study, the female and male population of wild type (48 and 47 plants), HEI10<sup>oe</sup> (144  
378 and 141 plants), *zyp1* (48 and 47 plants) and *zyp1* HEI10<sup>oe</sup> (142 and 138 plants) were sequenced  
379 by Illumina HiSeq3000 (2x150bp) conducted by the Max Planck-Genome-center  
380 (<https://mpgc.mpi-pz.mpg.de/home/>). The raw sequencing data of the female and male  
381 population of wild type (212 and 120 plants respectively) and *zyp1* (224 and 178 plants) from  
382 a previous study (ArrayExpress number E-MTAB-9593)<sup>11</sup> were also included in this study. In  
383 total, we analyzed 260 and 167 wild type female and male, 144 and 141 HEI10<sup>oe</sup> female and  
384 male, 272 and 225 *zyp1* female and male, 142 and 138 *zyp1* HEI10<sup>oe</sup> female and male plants,

385 separately. The raw sequencing data were quality-controlled using FastQC v0.11.9  
386 (<http://www.bioinformatics.babraham.ac.uk/projects/fastqc/>). The sequencing reads were  
387 aligned to the *Arabidopsis thaliana* Col-0 TAIR10 reference genome, which was downloaded  
388 from TAIR <sup>38,39</sup>, using BWA v0.7.15-r1140<sup>40</sup>, with default parameters. A set of Sambamba  
389 v0.6.8<sup>41</sup> commands was used for sorting and removing duplicated mapped reads. The creation  
390 of the high-confidence SNP marker list between Col and *Ler*, meiotic CO detection (a sliding  
391 window-based method, with a window size of 50 kb and a step size of 25 kb), check and  
392 filtering of low covered and potential contaminated samples were performed according to  
393 previous protocols<sup>11,27,42-44</sup>. Samples of each population were randomly selected for checking  
394 predicted COs manually by inGAP-family<sup>43</sup>. The Coefficient of Coincidence (CoC) was  
395 calculated for CO interference analysis using MADpattern<sup>45,46</sup>, with a number of 13 intervals.  
396 Chromosome 4 was excluded from interference analyses. To profile the CO distribution along  
397 chromosomes, CO position was defined randomly in the range of CO interval and a sliding  
398 window-based strategy was used, with 1 Mb window size and 50 kb step size. Then, the local  
399 distribution of recombination (CO resolution  $\leq 1000$  bp) was explored by CHIPseeker  
400 v1.22.1<sup>47</sup>, with the promoter region defined as 2000 bp upstream of the transcription start site.

#### 401 **Aneuploidy screening by whole genome sequencing**

402 The sequencing depth of each non-overlapping 100 kb window across the genome was  
403 evaluated by Mosdepth v0.2.7<sup>48</sup> with parameters of “-n --fast-mode --by 10000”. For each  
404 sample, pairwise testing of sequencing depths along chromosomes was performed using the  
405 Mann-Whitney test, and significant  $p$  values were adjusted using the *fdr* method. A pair of  
406 tested chromosomes with fold change  $> 1.2$  and  $p$  value  $< 1e-20$  was considered as aneuploid.

#### 407 **Mathematical model of CO patterning**

408 Our mathematical model describes the concentration  $c(x, t)$  of HEI10 along the SC of length  
409  $L$  together with the amounts  $M_i(t)$  of HEI10 in  $N$  droplets that are placed at positions  $x_i$  along  
410 the SC for  $i = 1, \dots, N$ . Here,  $x$  denotes the length along the SC and  $t$  denotes time. Similar to  
411 the model presented in ref.<sup>6</sup>, we account for the diffusion of HEI10 along the SC and the  
412 exchange of HEI10 between SC and droplets. Droplet  $i$  grows if the local HEI10 concentration  
413 on the SC,  $c(x_i)$ , is larger than the equilibrium concentration  $c^{\text{eq}}(M_i) = c_0^{\text{eq}} \frac{M_i}{1+M_i^{1+\alpha}}$ ,

414 
$$\frac{dM_i}{dt} = \Lambda [c(x_i) - c^{\text{eq}}(M_i)]$$

415 where  $\Lambda$  quantifies the rate of HEI10 exchange. HEI10 diffuses with diffusivity  $D$  along the  
416 SC and is exchanged with droplets,

417 
$$\frac{\partial c}{\partial t} = D \frac{\partial^2 c}{\partial x^2} - \Lambda \sum_{i=1}^N \delta(x - x_i) [c(x_i) - c^{\text{eq}}(M_i)]$$

418 We impose no-flux boundary conditions at  $x = 0$  and  $x = L$ , so the total amount of HEI10 is  
419 conserved. We implemented this model using finite differences by discretizing the SC using  
420 50 grid points and solved the resulting equations using an explicit Euler scheme.

421 We initialize the system with a uniform concentration on the SC,  $c(x, t = 0) = c_{\text{init}}$ . The  $N$   
422 droplets are positioned uniformly along the SC and their sizes  $M_i$  are chosen independently  
423 from a normal distribution with mean  $M_{\text{init}}$  and standard deviation  $\sigma$ , which has been truncated  
424 to  $[M_{\text{init}} - 3\sigma, M_{\text{init}} + 3\sigma]$ . The diffusivity  $D = 1.1 \mu\text{m}^2/\text{s}$ , the exchange rate  $\Lambda = 2.1 \mu\text{m}/\text{s}$ ,  
425 the exponent  $\alpha = 0.25$ , and the base equilibrium concentration  $c_0^{\text{eq}} = 1.35 \text{ a.u.}/\mu\text{m}$ , are  
426 inspired by ref.<sup>6</sup>. We use SC lengths  $L$  measured in wild type (Figure 4N) and estimate an initial  
427 droplet density of four droplets per  $\mu\text{m}$ , based on cytology<sup>49</sup>. For simulations, we choose  
428  $M_{\text{init}} = y \cdot 3.4 \text{ a.u.}$ ,  $\sigma_{\text{init}} = y \cdot 1.1 \text{ a.u.}$ , and  $c_{\text{init}} = y \cdot 1.4 \text{ a.u.}/\mu\text{m}$ , where  $y$  is a factor to  
429 account for higher HEI10 expression levels. We chose  $y = 2$  for wild type Col,  $y = 6$  for  
430 HEI10<sup>oe het</sup> Col,  $y = 8$  for HEI10<sup>oe homo</sup> Col,  $y = 1.5$  for wild type Col/*Ler*, and  $y = 5.5$  for  
431 HEI10<sup>oe het</sup> Col/*Ler*, which accounts for the reduced activity in *Ler*<sup>50</sup> and HEI10  
432 overexpression. We simulate droplet coarsening on each individual SC for male and female  
433 meiosis for 10h, comparable to the duration of pachytene<sup>51,52</sup>. Only droplets above a threshold  
434 size of  $M_{\text{thresh}} = 3 \text{ a.u.}$  are assumed to attract MLH1 and form class I COs. The associated COs  
435 per chromatid were determined by choosing COs from the bivalent independently with 50%  
436 probability.

437 In the case of the *zyp1* mutant, our model implies that all CO positions are independent. To  
438 obtain a theoretical distribution of COs, we thus first determine the number of COs per  
439 chromatid by sampling a Poisson distribution with a mean given by the experimental data  
440 (Figure 4N) and then distribute these COs uniformly along the chromatid length.

441 **Data Availability**

442 MLH1 counts and SC length measurements are shown in table S1 and S6, respectively. The  
443 raw sequencing data is deposited in ArrayExpress of EMBL-EBI with accession numbers E-  
444 MTAB-11696. The list of identified COs in the female and male populations of wild type,  
445 HEI10<sup>oe</sup>, *zyp1*, and *zyp1* HEI10<sup>oe</sup> can be accessed in Supplemental Table S2-S5.

446

447 **Acknowledgements**

448 This work was supported by core funding from the Max Planck Society to R.M., M.E., as well  
449 as D.Z. and an Alexander von Humboldt Fellowship to Q.L. and J.J. The IJPB benefits from  
450 the support of Saclay Plant Sciences-SPS (ANR-17-EUR-0007). We thank Abby Dernburg for  
451 enlightening discussions. We thank Ian Henderson for kindly providing the C2 line. We thank  
452 Neysan Donnelly for proofreading the manuscript.

453

454 **Author contributions**

455 S.D. produced and analyzed the MLH1-HEI10 cytological data, developed the protocol for  
456 female immunolocalization, produced all the genetic material, and analyzed fertility. Q.L.  
457 analyzed the sequencing data and performed recombination, interference, and aneuploidy  
458 analyses. J.J. generated SC images, and analyzed chromosome missegregation and SC length  
459 data. M.E. and D.Z. developed the mathematical model of CO patterning. M.G. developed the  
460 method for chromosome 3D analyses. R.M. lead the project and wrote the manuscript with  
461 input from all co-authors.

462 Supplementary Information is available for this paper

463 Correspondence and requests for materials should be addressed to Raphael Mercier

464



## 465     **References**

- 466     1     Otto, S. P. & Payseur, B. A. Crossover Interference: Shedding Light on the Evolution of  
467     Recombination. *Annual Review of Genetics* **53**, 19-44, doi:10.1146/annurev-genet-040119-  
468     093957 (2019).
- 469     2     Pyatnitskaya, A., Borde, V., De Muyt, A. & Crossing and zipping: molecular duties of the ZMM  
470     proteins in meiosis. *Chromosoma* **128**, 181-198, doi:10.1007/s00412-019-00714-8 (2019).
- 471     3     von Diezmann, L. & Rog, O. Let's get physical - mechanisms of crossover interference. *J Cell*  
472     *Sci* **134**, doi:10.1242/jcs.255745 (2021).
- 473     4     Kleckner, N., Storlazzi, A. & Zickler, D. Coordinate variation in meiotic pachytene SC length  
474     and total crossover/chiasma frequency under conditions of constant DNA length. *Trends in*  
475     *Genetics* **19**, 623-628, doi:<https://doi.org/10.1016/j.tig.2003.09.004> (2003).
- 476     5     Zhang, L., Stauffer, W., Zwicker, D. & Dernburg, A. F. Crossover patterning through kinase-  
477     regulated condensation and coarsening of recombination nodules. *bioRxiv*,  
478     2021.2008.2026.457865, doi:10.1101/2021.08.26.457865 (2021).
- 479     6     Morgan, C. *et al.* Diffusion-mediated HEI10 coarsening can explain meiotic crossover  
480     positioning in Arabidopsis. *Nat Commun* **12**, 4674, doi:10.1038/s41467-021-24827-w (2021).
- 481     7     Sturtevant, A. H. The linear arrangement of six sex-linked factors in Drosophila, as shown by  
482     their mode of association. *J Exp Zool* **14**, 43-59, doi:DOI 10.1002/jez.1400140104 (1913).
- 483     8     Sturtevant, A. H. The behavior of the chromosomes as studied through linkage. *Zeitschrift für*  
484     *induktive Abstammungs- und Vererbungslehre* **13**, 234-287, doi:10.1007/BF01792906 (1915).
- 485     9     Zickler, D. & Kleckner, N. A few of our favorite things: Pairing, the bouquet, crossover  
486     interference and evolution of meiosis. *Seminars in Cell & Developmental Biology* **54**, 135-  
487     148, doi:<https://doi.org/10.1016/j.semcdb.2016.02.024> (2016).
- 488     10     France Martin, G. *et al.* ZYP1 is required for obligate cross-over formation and cross-over  
489     interference in Arabidopsis. *Proceedings of the National Academy of Sciences* **118**,  
490     e2021671118, doi:10.1073/pnas.2021671118 (2021).
- 491     11     Capilla-Pérez, L. *et al.* The synaptonemal complex imposes crossover interference and  
492     heterochiasmy in. *Proceedings of the National Academy of Sciences* **118**, e2023613118,  
493     doi:10.1073/pnas.2023613118 (2021).
- 494     12     Libuda, D. E., Uzawa, S., Meyer, B. J. & Villeneuve, A. M. Meiotic chromosome structures  
495     constrain and respond to designation of crossover sites. *Nature* **502**, 703-706,  
496     doi:10.1038/nature12577 (2013).
- 497     13     Gordon, S. G., Kursel, L. E., Xu, K. & Rog, O. Synaptonemal Complex dimerization regulates  
498     chromosome alignment and crossover patterning in meiosis. *PLOS Genetics* **17**, e1009205,  
499     doi:10.1371/journal.pgen.1009205 (2021).
- 500     14     Voelkel-Meiman, K., Cheng, S.-Y., Morehouse, S. J. & MacQueen, A. J. Synaptonemal  
501     Complex Proteins of Budding Yeast Define Reciprocal Roles in MutSy-Mediated Crossover  
502     Formation. *Genetics* **203**, 1091-1103, doi:10.1534/genetics.115.182923 (2016).
- 503     15     Voelkel-Meiman, K. *et al.* Crossover recombination and synapsis are linked by adjacent  
504     regions within the N terminus of the Zip1 synaptonemal complex protein. *PLOS Genetics* **15**,  
505     e1008201, doi:10.1371/journal.pgen.1008201 (2019).
- 506     16     Drouaud, J. *et al.* Sex-Specific Crossover Distributions and Variations in Interference Level  
507     along Arabidopsis thaliana Chromosome 4. *PLOS Genetics* **3**, e106,  
508     doi:10.1371/journal.pgen.0030106 (2007).
- 509     17     Shang, Y. *et al.* Meiotic chromosome organization and crossover pattern<sup>†</sup>. *Biology of*  
510     *Reproduction*, ioac040, doi:10.1093/biolre/ioac040 (2022).
- 511     18     Lloyd, A. & Jenczewski, E. Modelling Sex-Specific Crossover Patterning in Arabidopsis.  
512     *Genetics* **211**, 847-859, doi:10.1534/genetics.118.301838 (2019).
- 513     19     Chelysheva, L. *et al.* The Arabidopsis HEI10 is a new ZMM protein related to Zip3. *PLoS Genet*  
514     **8**, e1002799, doi:10.1371/journal.pgen.1002799 (2012).

- 515 20 Dubois, E. *et al.* Building bridges to move recombination complexes. *Proceedings of the*  
516 *National Academy of Sciences* **116**, 12400-12409, doi:10.1073/pnas.1901237116 (2019).
- 517 21 Wang, K. *et al.* The Role of Rice HEI10 in the Formation of Meiotic Crossovers. *PLOS Genetics*  
518 **8**, e1002809, doi:10.1371/journal.pgen.1002809 (2012).
- 519 22 Qiao, H. *et al.* Antagonistic roles of ubiquitin ligase HEI10 and SUMO ligase RNF212 regulate  
520 meiotic recombination. *Nat Genet* **46**, 194-199, doi:10.1038/ng.2858 (2014).
- 521 23 Ziolkowski, P. A. *et al.* Natural variation and dosage of the HEI10 meiotic E3 ligase control  
522 Arabidopsis crossover recombination. *Genes Dev* **31**, 306-317, doi:10.1101/gad.295501.116  
523 (2017).
- 524 24 Jiao, W.-B. & Schneeberger, K. Chromosome-level assemblies of multiple Arabidopsis  
525 genomes reveal hotspots of rearrangements with altered evolutionary dynamics. *Nature*  
526 *Communications* **11**, 989, doi:10.1038/s41467-020-14779-y (2020).
- 527 25 Zapata, L. *et al.* Chromosome-level assembly of Arabidopsis thaliana Ler reveals the extent of  
528 translocation and inversion polymorphisms. *Proceedings of the National Academy of*  
529 *Sciences* **113**, E4052-E4060, doi:10.1073/pnas.1607532113 (2016).
- 530 26 Wang, S. *et al.* Per-Nucleus Crossover Covariation and Implications for Evolution. *Cell* **177**,  
531 326-338, doi:10.1016/j.cell.2019.02.021 (2019).
- 532 27 Lian, Q. *et al.* The megabase-scale crossover landscape is independent of sequence  
533 divergence. *bioRxiv*, 2022.2001.2010.474936, doi:10.1101/2022.01.10.474936 (2022).
- 534 28 Fernandes, J. B., Séguéla-Arnaud, M., Larchevêque, C., Lloyd, A. H. & Mercier, R. Unleashing  
535 meiotic crossovers in hybrid plants. *Proceedings of the National Academy of Sciences* **115**,  
536 2431-2436, doi:10.1073/pnas.1713078114 (2018).
- 537 29 Séguéla-Arnaud, M. *et al.* Multiple mechanisms limit meiotic crossovers: TOP3 $\alpha$  and two  
538 BLM homologs antagonize crossovers in parallel to FANCM. *Proc Natl Acad Sci U S A* **112**,  
539 4713-4718, doi:10.1073/pnas.1423107112 (2015).
- 540 30 Crismani, W. *et al.* FANCM limits meiotic crossovers. *Science* **336**, 1588-1590,  
541 doi:10.1126/science.1220381 (2012).
- 542 31 Fozard, J. A., Morgan, C. & Howard, M. The synaptonemal complex controls cis- versus trans-  
543 interference in coarsening-based meiotic crossover patterning. *bioRxiv*,  
544 2022.2004.2011.487855, doi:10.1101/2022.04.11.487855 (2022).
- 545 32 Lake, C. M. *et al.* Vilya, a component of the recombination nodule, is required for meiotic  
546 double-strand break formation in Drosophila. *Elife* **4**, e08287, doi:10.7554/eLife.08287  
547 (2015).
- 548 33 Stapley, J., Feulner, P. G. D., Johnston, S. E., Santure, A. W. & Smadja, C. M. Variation in  
549 recombination frequency and distribution across eukaryotes: patterns and processes.  
550 *Philosophical transactions of the Royal Society of London. Series B, Biological sciences* **372**,  
551 doi:10.1098/rstb.2016.0455 (2017).
- 552 34 Rowan, B. A., Patel, V., Weigel, D. & Schneeberger, K. Rapid and Inexpensive Whole-Genome  
553 Genotyping-by-Sequencing for Crossover Localization and Fine-Scale Genetic Mapping. *G3*  
554 *Genes/Genomes/Genetics* **5**, 385-398, doi:10.1534/g3.114.016501 (2015).
- 555 35 Cromer, L. *et al.* Patronus is the elusive plant securin, preventing chromosome separation by  
556 antagonizing separase. *Proc Natl Acad Sci U S A* **116**, 16018-16027,  
557 doi:10.1073/pnas.1906237116 (2019).
- 558 36 Cromer, L. *et al.* Centromeric Cohesion Is Protected Twice at Meiosis, by SHUGOSHINs at  
559 Anaphase I and by PATRONUS at Interkinesis. *Current Biology* **23**, 2090-2099,  
560 doi:<https://doi.org/10.1016/j.cub.2013.08.036> (2013).
- 561 37 Chelysheva, L. *et al.* An Easy Protocol for Studying Chromatin and Recombination Protein  
562 Dynamics during Arabidopsis thaliana Meiosis: Immunodetection of Cohesins, Histones and  
563 MLH1. *Cytogenetic and genome research* **129**, 143-153, doi:10.1159/000314096 (2010).
- 564 38 Lamesch, P. *et al.* The Arabidopsis Information Resource (TAIR): improved gene annotation  
565 and new tools. *Nucleic Acids Research* **40**, D1202-D1210, doi:10.1093/nar/gkr1090 (2012).

- 566 39 The Arabidopsis Genome, I. Analysis of the genome sequence of the flowering plant  
567 Arabidopsis thaliana. *Nature* **408**, 796-815, doi:10.1038/35048692 (2000).
- 568 40 Li, H. & Durbin, R. Fast and accurate short read alignment with Burrows–Wheeler transform.  
569 *Bioinformatics* **25**, 1754-1760, doi:10.1093/bioinformatics/btp324 (2009).
- 570 41 Tarasov, A., Vilella, A. J., Cuppen, E., Nijman, I. J. & Prins, P. Sambamba: fast processing of  
571 NGS alignment formats. *Bioinformatics* **31**, 2032-2034, doi:10.1093/bioinformatics/btv098  
572 (2015).
- 573 42 Qi, J., Chen, Y., Copenhaver Gregory, P. & Ma, H. Detection of genomic variations and DNA  
574 polymorphisms and impact on analysis of meiotic recombination and genetic mapping.  
575 *Proceedings of the National Academy of Sciences* **111**, 10007-10012,  
576 doi:10.1073/pnas.1321897111 (2014).
- 577 43 Lian, Q., Chen, Y., Chang, F., Fu, Y. & Qi, J. inGAP-family: Accurate Detection of Meiotic  
578 Recombination Loci and Causal Mutations by Filtering Out Artificial Variants due to Genome  
579 Complexities. *Genomics, Proteomics & Bioinformatics*,  
580 doi:<https://doi.org/10.1016/j.gpb.2019.11.014> (2021).
- 581 44 Wang, H. *et al.* The cohesin loader SCC2 contains a PHD finger that is required for meiosis in  
582 land plants. *PLOS Genetics* **16**, e1008849, doi:10.1371/journal.pgen.1008849 (2020).
- 583 45 Zhang, L., Liang, Z., Hutchinson, J. & Kleckner, N. Crossover Patterning by the Beam-Film  
584 Model: Analysis and Implications. *PLOS Genetics* **10**, e1004042,  
585 doi:10.1371/journal.pgen.1004042 (2014).
- 586 46 White, M. A., Wang, S., Zhang, L. & Kleckner, N. in *Meiosis* (ed David T. Stuart) 305-323  
587 (Springer New York, 2017).
- 588 47 Yu, G., Wang, L.-G. & He, Q.-Y. ChIPseeker: an R/Bioconductor package for ChIP peak  
589 annotation, comparison and visualization. *Bioinformatics* **31**, 2382-2383,  
590 doi:10.1093/bioinformatics/btv145 (2015).
- 591 48 Pedersen, B. S. & Quinlan, A. R. Mosdepth: quick coverage calculation for genomes and  
592 exomes. *Bioinformatics* **34**, 867-868, doi:10.1093/bioinformatics/btx699 (2018).
- 593 49 Capilla-Pérez, L. *et al.* The synaptonemal complex imposes crossover interference and  
594 heterochiasmy in Arabidopsis. *Proc. Natl. Acad. Sci. USA* **118**, e2023613118,  
595 doi:10.1073/pnas.2023613118 (2021).
- 596 50 Ziolkowski, P. A. *et al.* Natural variation and dosage of the HEI10 meiotic E3 ligase control  
597 Arabidopsis crossover recombination. *Genes & Development* (2017).
- 598 51 Armstrong, S. J., Franklin, F. C. H. & Jones, G. H. A meiotic time-course for Arabidopsis  
599 thaliana. *Sex. Plant Reprod.* **16**, 141--149, doi:10.1007/s00497-003-0186-4 (2003).
- 600 52 Prusicki, M. A. *et al.* Live cell imaging of meiosis in Arabidopsis thaliana. *eLife* **8**, e42834,  
601 doi:10.7554/eLife.42834 (2019).
- 602 53 Serra, H. *et al.* Massive crossover elevation via combination of HEI10 and recq4a recq4b  
603 during Arabidopsis meiosis. *Proc Natl Acad Sci U S A* **115**, 2437-2442,  
604 doi:10.1073/pnas.1713071115 (2018).

605

606

## 607 **Figure legends**

608 **Figure 1. Massive increase in crossovers through combination of *zyp1* mutation and**  
609 **HEI10 overexpression**

610 (A) MLH1 foci in Col wild type and *zyp1* HEI10<sup>oe</sup> <sup>homo</sup> meiocytes. Following  
611 immunolocalization, REC8 (Purple) and HEI10 (not shown) were imaged with STED while  
612 MLH1 (green) was imaged with confocal microscopy. The maximum intensity projection is  
613 shown. Scale bar=1 $\mu$ m. (B) Corresponding MLH1 foci quantification, in female and male,  
614 inbred Col and hybrid Col/*Ler*. The HEI10 transgene originates from the C2 line and is either  
615 homozygous (HEI10<sup>oe</sup> <sup>het</sup>) or heterozygous (HEI10<sup>oe</sup> <sup>homo</sup>). Each dot is an individual cell, and  
616 the mean is indicated by a bar and a number on the top. (C) Experimental design for  
617 construction of female and male hybrid populations for sequencing. (D) The number of COs  
618 per gamete in female and male populations of wild type, HEI10<sup>oe</sup>, *zyp1*, and *zyp1* HEI10<sup>oe</sup>.  
619 Each point is a BC1/gamete, and the means are indicated by horizontal dashed lines and  
620 numbers on the top. The population size is shown in parentheses. (E) Correlation analysis  
621 between mean number of COs per chromosome per gamete and chromosome size (Mb). Error  
622 bars are the 90% confidence intervals of the mean. Pearson's correlation coefficients are shown  
623 in parentheses. (F) Chromosomal genotypes are shown for representative gametes for wild type  
624 and mutants, and for extreme cases for *zyp1* HEI10<sup>oe</sup> populations. Centromere positions are  
625 indicated by white points.

626

627 **Figure 2. CO distribution and interference analysis in female and male wild type,**  
628 **HEI10<sup>oe</sup>, *zyp1*, and *zyp1* HEI10<sup>oe</sup>.**

629 (A–B) The distribution of COs on chromosome 1 in (A) female and (B) male of wild type,  
630 HEI10<sup>oe</sup>, *zyp1*, and *zyp1* HEI10<sup>oe</sup>. The other chromosomes are shown in Figure S3. (C–F)  
631 Distribution of distances between two COs for chromosomes with exactly two COs (Figure  
632 S5). The grey bar represents the expected distribution of COs without interference, calculated  
633 by permutation analysis of COs. The number of analyzed CO pairs and the p-value from the  
634 Mann-Whitney test between the expected and observed are indicated. (G–J) CoC curves in  
635 female and male meiosis of wild type, HEI10<sup>oe</sup>, *zyp1*, and *zyp1* HEI10<sup>oe</sup>, respectively.  
636 Chromosomes were divided into 13 intervals, for calculating the mean coefficient of  
637 coincidence of each pair of intervals.

638

639 **Figure 3. Analysis of meiotic and fertility defects**

640 (A–F) DAPI-stained meiotic chromosome spreads from Col/*Ler* male meiocytes in wild type  
641 (A, B) and *zyp1* HEI10<sup>oe</sup> (C–F). (A, C, E) Metaphase I. (B, D, F) Metaphase II. (C, D) Normal  
642 chromosome configurations in *zyp1* HEI10<sup>oe</sup>. (E, F) Rare abnormal chromosome  
643 configurations in *zyp1* HEI10<sup>oe</sup>. Scale bar=10µm. (G–H) Representative cleared fruits of wild-  
644 type Col and *zyp1* HEI10<sup>oe</sup> mutants. (I) Corresponding quantification of fertility. Each dot  
645 represents the fertility of an individual plant, measured as the number of seeds per fruits  
646 averaged on ten fruits. The red bar shows the mean. All plants were siblings grown together in  
647 a growth chamber. *P* values are one-way ANOVA followed by Fisher’s LSD test. (J) The  
648 percentage of aneuploid samples detected in each population (Figure S6-7). The proportion of  
649 aneuploid samples in each population is shown on top of the bars.

650

#### 651 **Figure 4. Analysis of SC/axis lengths in female and male meiocytes**

652 (A–D) REC8 immunolocalization in female and male meiocytes of wild type and *zyp1* HEI10<sup>oe</sup>  
653 <sup>homo</sup> (Col). Imaging was done with 3D-STED and the projection is shown. Scale bar=1µm. (E–  
654 H) REC8 signal was traced in 3D. Each bivalent pair is color-coded. (I–L) Individual trace of  
655 the longest chromosome (presumably chromosome 1), with start-to-end color code. (M)  
656 Measurement of the total SC length. Each dot is the SC length of an individual cell. The bars  
657 indicate the mean. One-way ANOVA followed by Sidak correction showed that SCs were  
658 systematically longer in males than in females ( $p < 0.0001$ ). The same test did not detect any  
659 differences between any of the pairs of males of different genotypes ( $p > 0.4$ ). For females, none  
660 of the pairwise comparisons were significantly different except in Col/*Ler* HEI10<sup>oe</sup> that was  
661 lower than Col/*Ler zyp1* ( $p=0.006$ ) and Col *zyp1* ( $p=0.008$ ). Note that variations in slide  
662 preparation and exact meiotic stage may affect this result. (N) Correlation analysis between the  
663 mean number of COs per chromosome per gamete and SC length (µm) in Col/*Ler* background.  
664 SCs were attributed to specific chromosomes based on their length (e.g., the longest was  
665 presumably chromosome 1). Pearson’s correlation coefficients are shown in parentheses. (O–  
666 P) The relationship between the mean number of MLH1 foci per cell and total SC length per  
667 cell in (O) Col background and (P) Col/*Ler* background. (Q) The relationship between the  
668 mean number of COs per gamete and SC length in Col/*Ler* background. The 90% confidence  
669 intervals are indicated as error bars.

#### 670 **Figure 5. Model of crossover patterning via HEI10 coarsening**

671 HEI10 (red) is captured by the central element of the SC and coarsens into large pro-CO  
672 droplets. The number of large pro-CO droplets is determined by SC length (heterochiasmy),  
673 and HEI10 expression levels. HEI10 overexpression increases CO number, and weakens  
674 interference but maintains heterochiasmy. In absence of an SC (*zyp1*), HEI10 is exchanged  
675 directly between the droplets and the nucleoplasm abolishing both interference and  
676 heterochiasmy, and the number of droplets depends on HEI10 expression level. Created with  
677 BioRender.com

678

679 **Figure 6. A coarsening model for crossover designation explains the measured data**

680 (A) Number of MLH1 foci predicted by the model compared to the experimental measurements  
681 shown in Figure 1B. Error bars denote 90% confidence. (B) Number of COs per chromatid  
682 predicted by our model compared to the experimental measurements shown in Figure 1D. The  
683 respective chromatids are labeled and error bars denote 90% confidence. (C–E) Predicted  
684 coefficient of coincidence curves; compare to Figure 2G–J. (F–J) Predicted distributions of  
685 distances between two COs for chromosomes with exactly two COs; compare to Figure 2C–F.  
686 (A–J) Numerical details are given in the Methods. Mean and confidence intervals were  
687 determined from  $n = 1000$  (except  $n = 500$  in panel A) independent repetitions.

688

## 689 Supplemental Figure legends

### 690 **Figure S1. Comparison of CO numbers between previous studies and this work.**

691 The number of COs per gamete in female and male populations of wild type and *zyp1*,  
692 respectively. Different genotypes and studies are indicated through different colors and shapes,  
693 respectively. The mean CO number of the population and significant *p* value (Mann-Whitney  
694 test) are indicated in the top parentheses, with the same color codes.

695

### 696 **Figure S2. Correlation analysis of CO numbers between chromosomes.**

697 Pearson's correlation analysis of CO numbers between chromosomes in the same gamete was  
698 performed in female and male populations of wild type, HEI10<sup>oe</sup>, *zyp1*, and *zyp1* HEI10<sup>oe</sup>  
699 individually. The sum of COs detected on chromosomes 1 and 2 was plotted against the sum  
700 of COs on chromosomes 3 and 5 in the same gamete. A jitter function was applied to avoid  
701 points overlapping. The correlation coefficients are shown in parentheses. The very low  
702 correlation is in contrast with observations in several other species<sup>26</sup> and may be due to lower  
703 cell-to-cell variation in Arabidopsis.

704

### 705 **Figure S3. The distribution of CO frequency along chromosomes.**

706 Comparison of CO distributions (sliding window-based, with window size of 1 Mb and step  
707 size of 50 kb) between female and male of wild type (A), HEI10<sup>oe</sup> (B), *zyp1* (C) and *zyp1*  
708 HEI10<sup>oe</sup> (D). Comparison of CO distribution among populations in female (E) and male (F)  
709 meiosis. The pericentromeric and centromeric regions are indicated by grey and blue shading,  
710 respectively. Consistent with previous observations<sup>11,53</sup>, there is a ~2.2 Mb region on the long  
711 arm of chromosome 4 where recombination is suppressed, which suggests a structural  
712 arrangement between the Col and Ler strains.

713

### 714 **Figure S4. The fine-scale distribution of COs.**

715 (A) The distribution of the length of CO intervals across populations. The length of 1 kb and 2  
716 kb are indicated by grey dashed lines. The number of analyzed COs is shown in parentheses.  
717 The median of CO intervals is 819 bp (B) The distribution of proportion of COs with interval  
718 lengths less than 1 kb (high-resolution), more than 2 kb, and the rest separately. (C) The  
719 distribution of proportion of high-resolution COs overlapping with genomic features. The  
720 promoter region is defined as the 2 kb upstream of the transcription start site. The proportion  
721 of the different genomic features is shown as the bar on the top, which is defined by following  
722 the priority of promoter, 5' UTR, 3' UTR, exon, intron, and intergenic regions. (D) The  
723 distribution of distance of high-resolution COs from nearest TSS.

724

725 **Figure S5. The distribution of positions of double-COs.**

726 Relative position of COs for chromosomes with exactly two COs (as in figure 2C-F). The  
727 position of the first and second CO of the pair, in female and male meiosis of wild type,  
728 HEI10<sup>oe</sup>, *zyp1*, and *zyp1* HEI10<sup>oe</sup>, respectively.

729

730 **Figure S6. The analysis of sequencing depths along chromosomes for aneuploidy**  
731 **screening.**

732 The sequencing depth was calculated for each 100 kb non-overlapped interval along  
733 chromosomes. The Mann-Whitney test was used for checking the differences between pairs of  
734 chromosomes, the significant p value was then adjusted by the fdr method. The identity of the  
735 detected aneuploidy is shown with the same color codes as for the corresponding populations.

736

737 **Figure S7. Sequencing depth along aneuploid chromosomes.**

738 The sequencing depth was calculated for each 100 kb non-overlapped interval along  
739 chromosomes. The pericentromeric and centromeric regions are indicated by grey and blue  
740 shading, respectively. The horizontal dashed line indicates the mean sequencing depth of the



741 sample. Aneuploidy is visible by higher coverage of one chromosome compared to the others.

742 The label of the detected aneuploidy and corresponding populations are presented individually.

743

744 **Table S1. Raw data of MLH1 counts.**

745 **Table S2. CO positions in wild-type population.**

746 **Table S3. CO positions in HEI10oe population.**

747 **Table S4. CO positions in *zyp1* population.**

748 **Table S5. CO positions in *zyp1* HEI10oe population.**

749 **Table S6. Raw data of SC Lengths.**

750 **Table S7. Summary data for mean MLH1 foci number, CO number, and SC length.**

751 **Table S8. Genotyping primers**

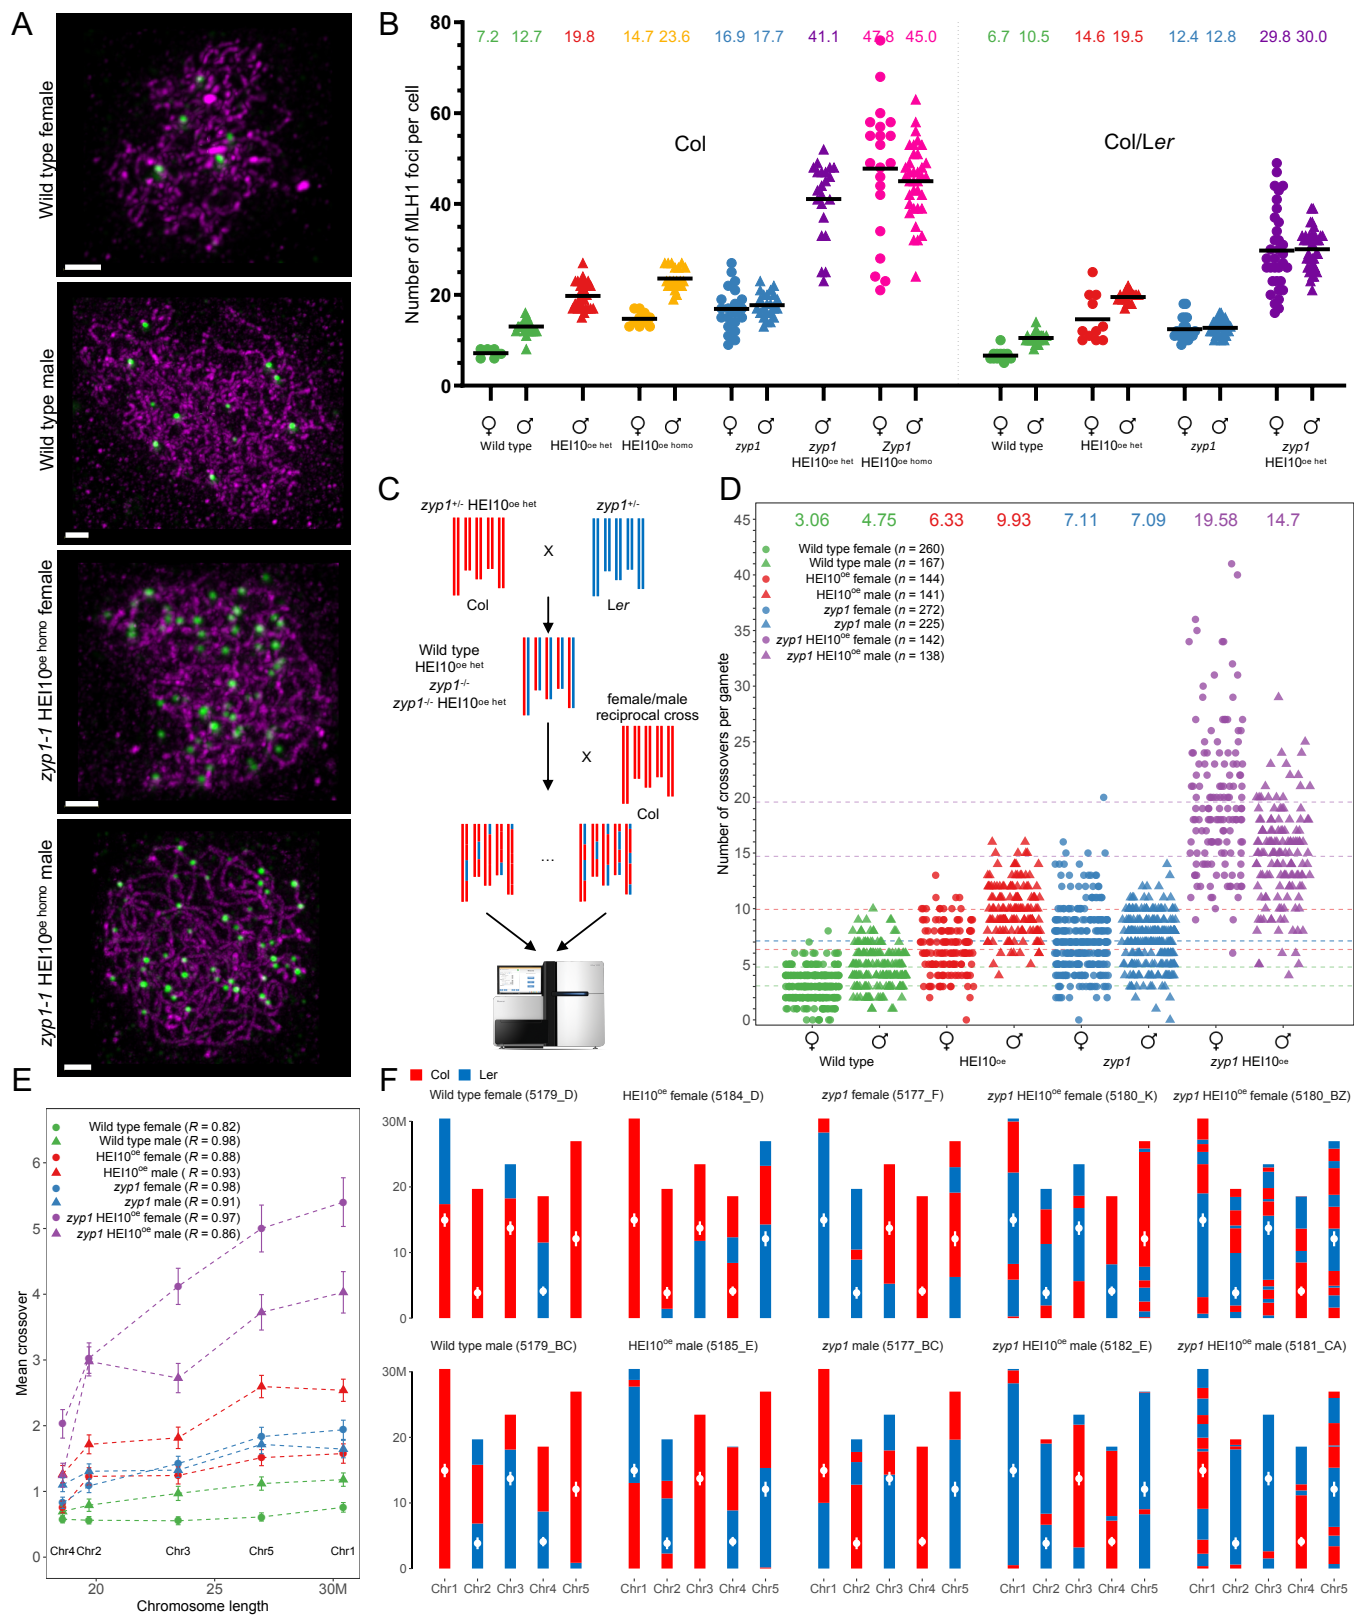

**Figure 1. Massive increase in crossovers through combination of *zyp1* mutation and HEI10 overexpression**

(A) MLH1 foci in Col wild type and *zyp1* HEI10<sup>oe</sup> homo meciocytes. Following immunolocalization, REC8 (Purple) and HEI10 (not shown) were imaged with STED while MLH1 (green) was imaged with confocal microscopy. The maximum intensity projection is shown. Scale bar=1 $\mu$ m. (B) Corresponding MLH1 foci quantification, in female and male, inbred Col and hybrid Col/Ler. The HEI10 transgene originates from the C2 line and is either homozygous (HEI10<sup>oe</sup> het) or heterozygous (HEI10<sup>oe</sup> homo). Each dot is an individual cell, and the mean is indicated by a bar and a number on the top. (C) Experimental design for construction of female and male hybrid populations for sequencing. (D) The number of COs per gamete in female and male populations of wild type, HEI10<sup>oe</sup>, *zyp1*, and *zyp1* HEI10<sup>oe</sup>. Each point is a BC1/gamete, and the means are indicated by horizontal dashed lines and numbers on the top. The population size is shown in parentheses. (E) Correlation analysis between mean number of COs per chromosome per gamete and chromosome size (Mb). Error bars are the 90% confidence intervals of the mean. Pearson's correlation coefficients are shown in parentheses. (F) Chromosomal genotypes are shown for representative gametes for wild type and mutants, and for extreme cases for *zyp1* HEI10<sup>oe</sup> populations. Centromere positions are indicated by white points.

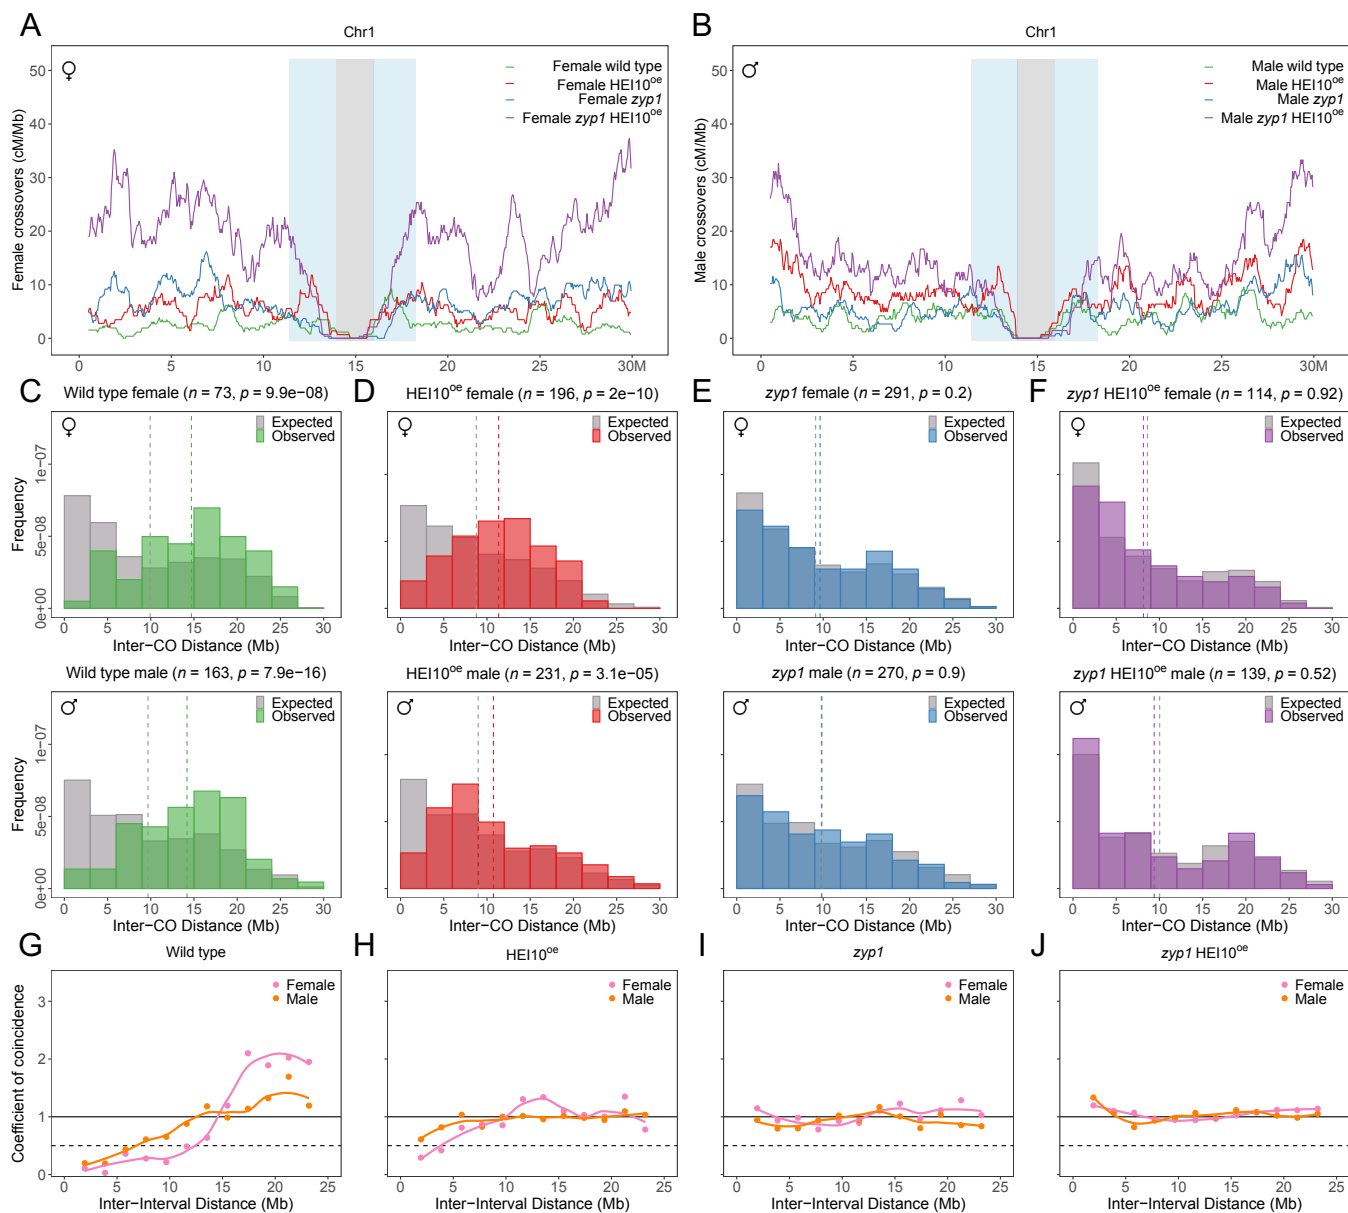

**Figure 2. CO distribution and interference analysis in female and male wild type, HEI10<sup>oe</sup>, *zyp1*, and *zyp1* HEI10<sup>oe</sup>.**

(A–B) The distribution of COs on chromosome 1 in (A) female and (B) male of wild type, HEI10<sup>oe</sup>, *zyp1*, and *zyp1* HEI10<sup>oe</sup>. The other chromosomes are shown in Figure S3. (C–F) Distribution of distances between two COs for chromosomes with exactly two COs. The grey bar represents the expected distribution of COs without interference, calculated by permutation analysis of COs. The number of analyzed CO pairs and the p-value from the Mann-Whitney test between the expected and observed are indicated. (G–J) CoC curves in female and male meiosis of wild type, HEI10<sup>oe</sup>, *zyp1*, and *zyp1* HEI10<sup>oe</sup>, respectively. Chromosomes were divided into 13 intervals, for calculating the mean coefficient of coincidence of each pair of intervals.

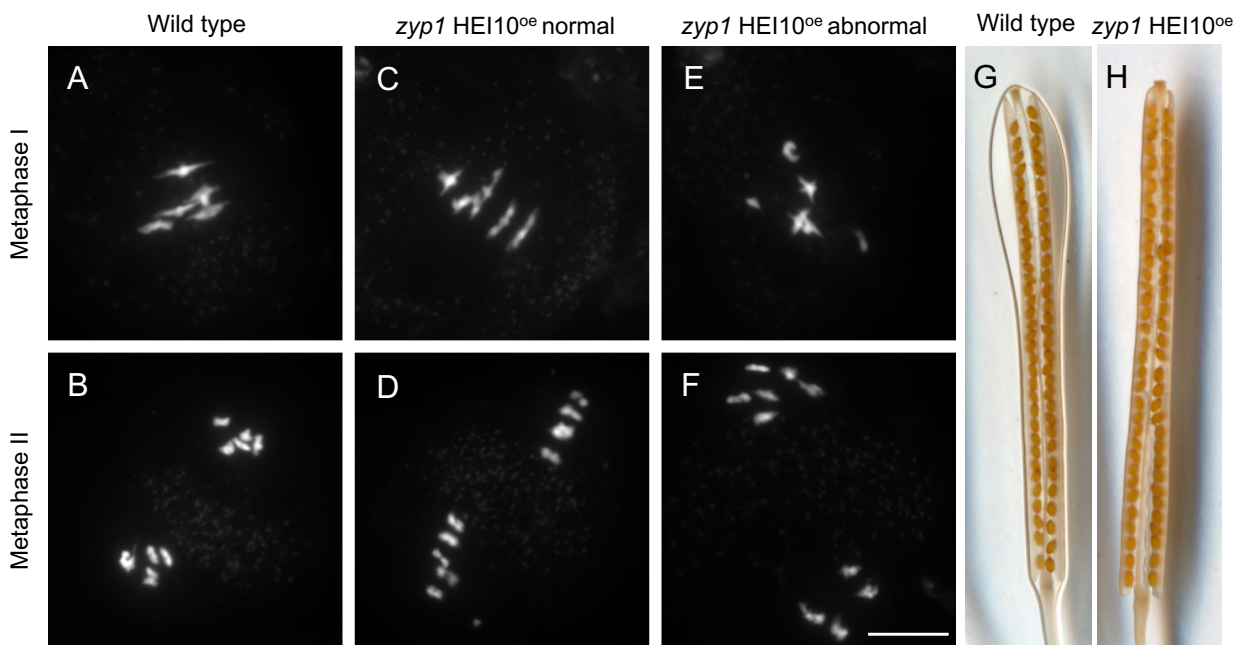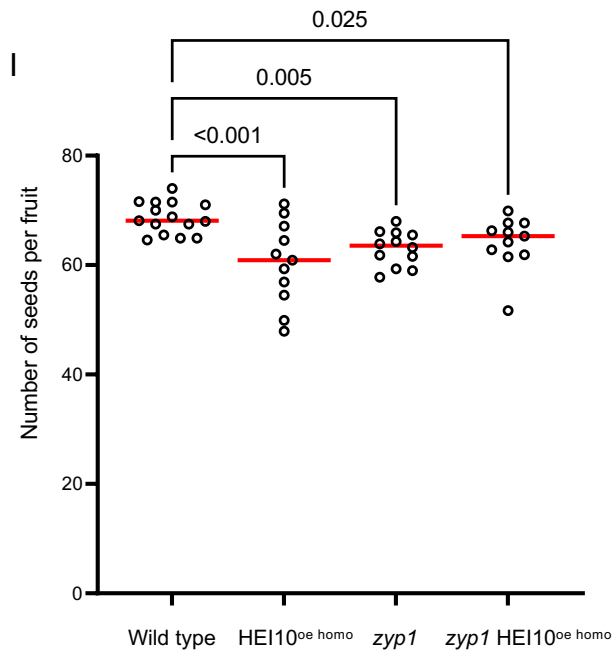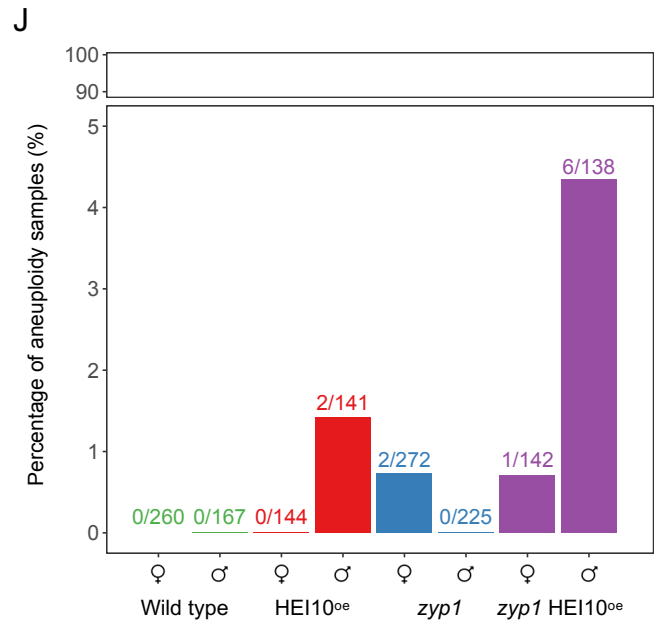

### Figure 3. Analysis of meiotic and fertility defects

(A–F) DAPI-stained meiotic chromosome spreads from Col/Ler male meiocytes in wild type (A, B) and *zyp1* HEI10<sup>oe</sup> (C–F). (A, C, E) Metaphase I. (B, D, F) Metaphase II. (C, D) Normal chromosome configurations in *zyp1* HEI10<sup>oe</sup>. (E, F) Rare abnormal chromosome configurations in *zyp1* HEI10<sup>oe</sup>. Scale bar=10 $\mu$ m. (G–H) Representative cleared fruits of wild-type Col and *zyp1* HEI10<sup>oe</sup> mutants. (I) Corresponding quantification of fertility. Each dot represents the fertility of an individual plant, measured as the number of seeds per fruits averaged on tenfruits. The red bar shows the mean. All plants were siblings grown together in a growth chamber. *P* values are one-way ANOVA followed by Fisher's LSD test. (J) The percentage of aneuploid samples detected in each population (Figure S6-7). The proportion of aneuploid samples in each population is shown on top of the bars.

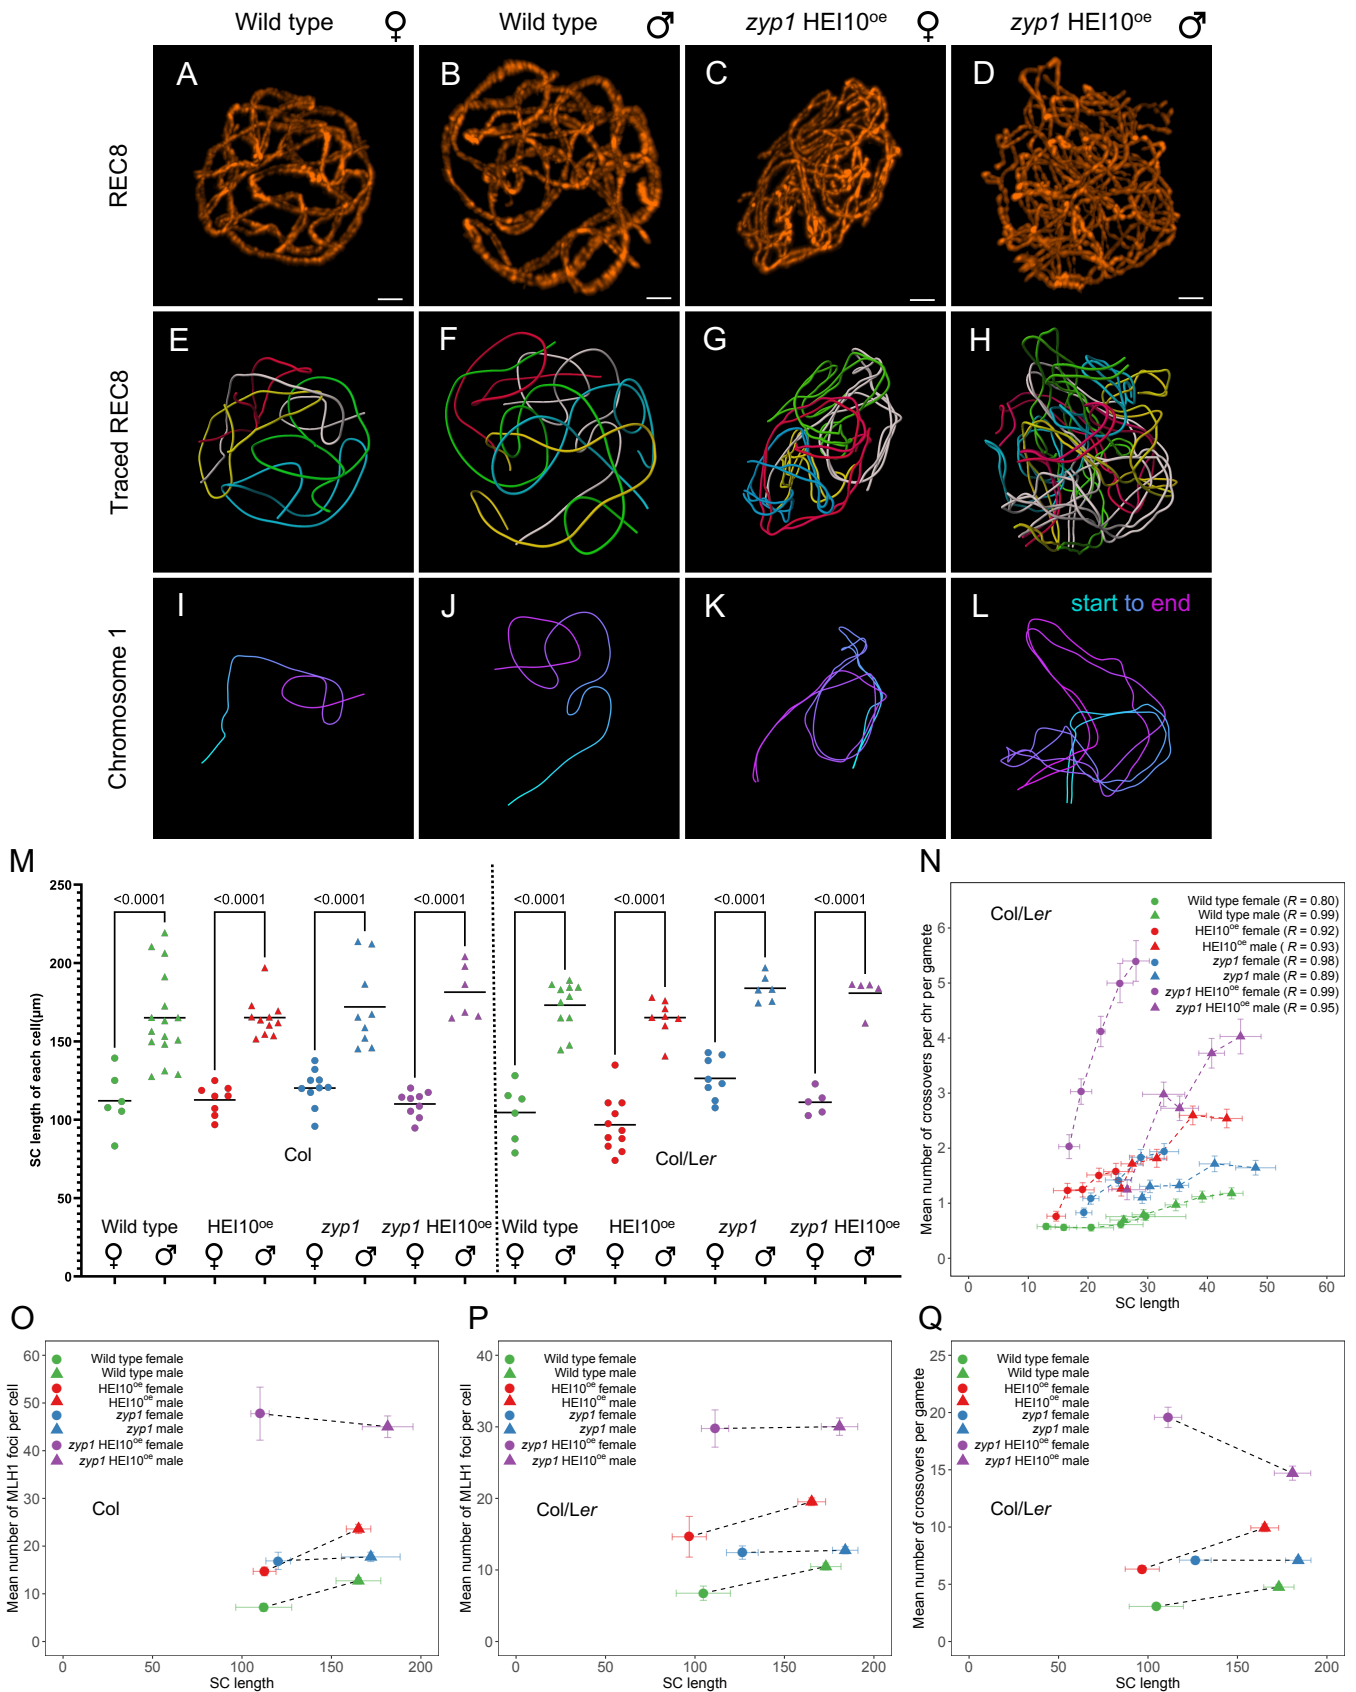

**Figure 4. Analysis of SC/axis lengths in female and male meiocytes**

(A–D) REC8 immunolocalization in female and male meiocytes of wild type and *zyp1* HEI10<sup>oe</sup> homo (Col). Imaging was done with 3D-STED and the projection is shown. Scale bar=1 $\mu$ m.

(E–H) REC8 signal was traced in 3D. Each bivalent pair is color-coded. (I–L) Individual trace of the longest chromosome (presumably chromosome 1), with start-to-end color code.

(M) Measurement of the total SC length. Each dot is the SC length of an individual cell. The bars indicate the mean. One-way ANOVA followed by Sidak correction showed that SCs were systematically longer in males than in females ( $p < 0.0001$ ). The same test did not detect any differences between any of the pairs of males of different genotypes ( $p > 0.4$ ). For females, none of the pairwise comparisons were significantly different except in Col/Ler HEI10<sup>oe</sup> that was lower than Col/Ler *zyp1* ( $p = 0.006$ ) and Col *zyp1* ( $p = 0.008$ ). Note that variations in slide preparation and exact meiotic stage may affect this result.

(N) Correlation analysis between the mean number of COs per chromosome per gamete and SC length ( $\mu$ m) in Col/Ler background. SCs were attributed to specific chromosomes based on their length (e.g., the longest was presumably chromosome 1). Pearson's correlation coefficients are shown in parentheses.

(O–P) The relationship between the mean number of MLH1 foci per cell and total SC length per cell in (O) Col background and (P) Col/Ler background. (Q) The relationship between the mean number of COs per gamete and SC length in Col/Ler background. The 90% confidence intervals are indicated as error bars.

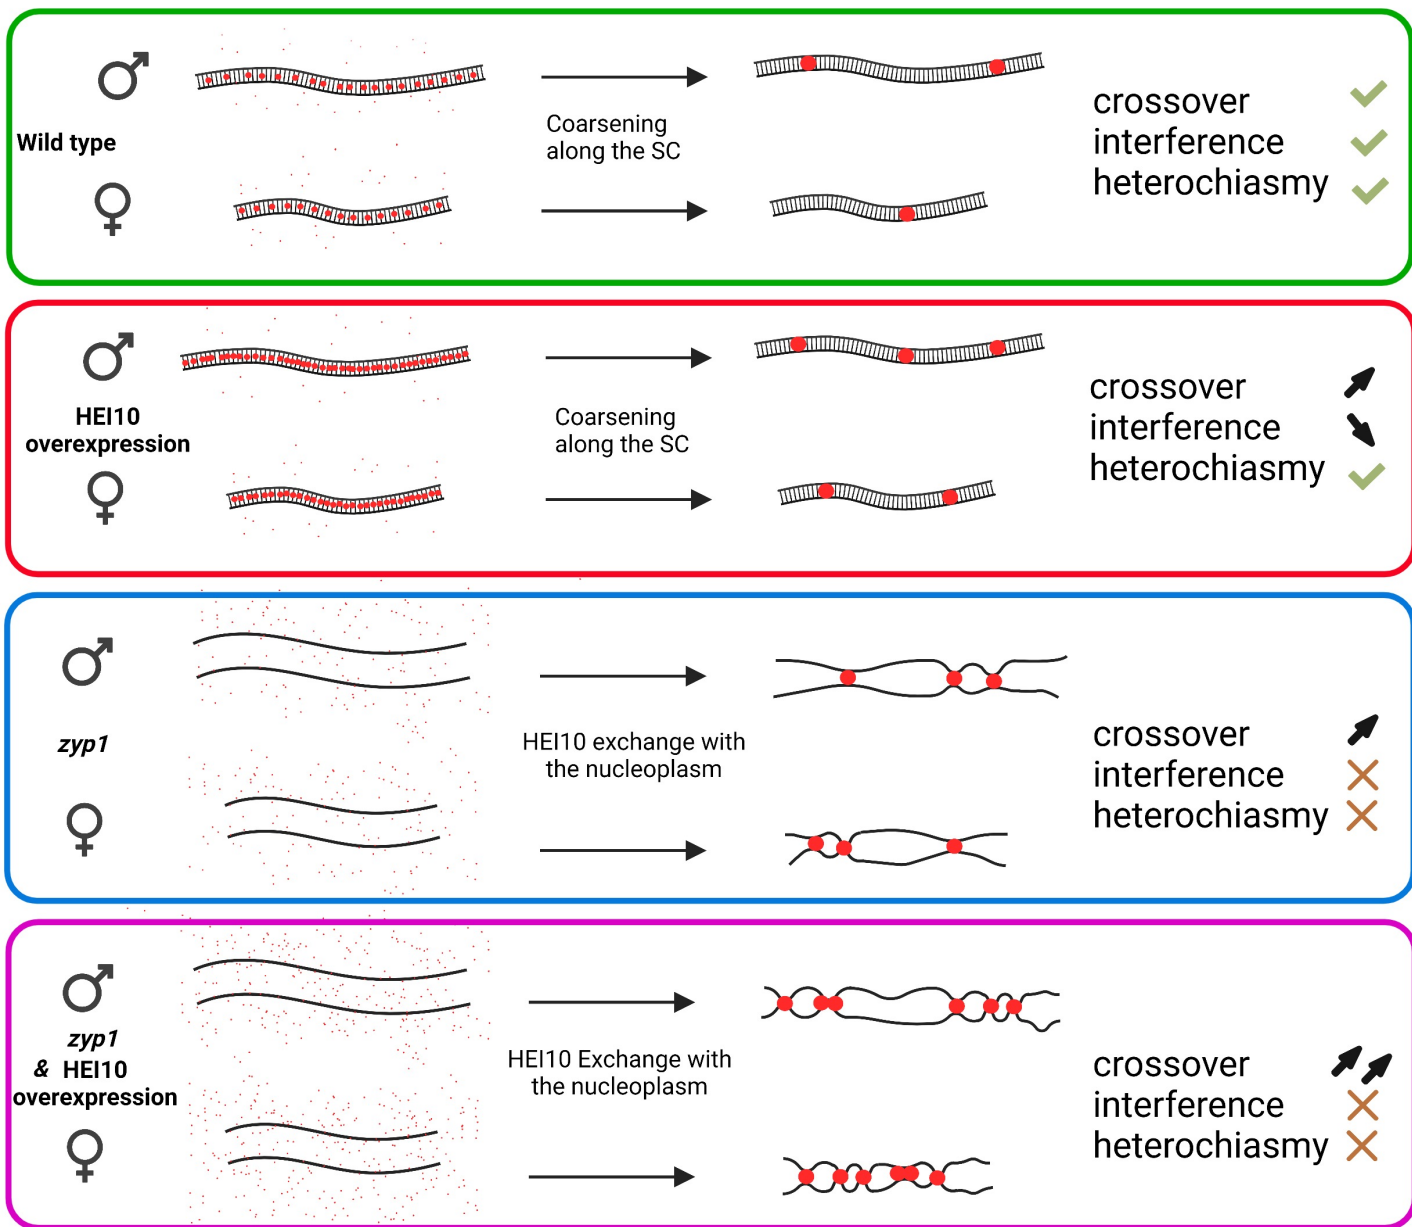

**Figure 5. Model of crossover patterning via HEI10 coarsening**

HEI10 (red) is captured by the central element of the SC and coarsens into large pro-CO droplets. The number of large pro-CO droplets is determined by SC length (heterochiasmy), and HEI10 expression levels. HEI10 overexpression increases CO number, and weakens interference but maintains heterochiasmy. In absence of an SC (*zyp1*), HEI10 is exchanged directly between the droplets and the nucleoplasm abolishing both interference and heterochiasmy, and the number of droplets depends on HEI10 expression level.

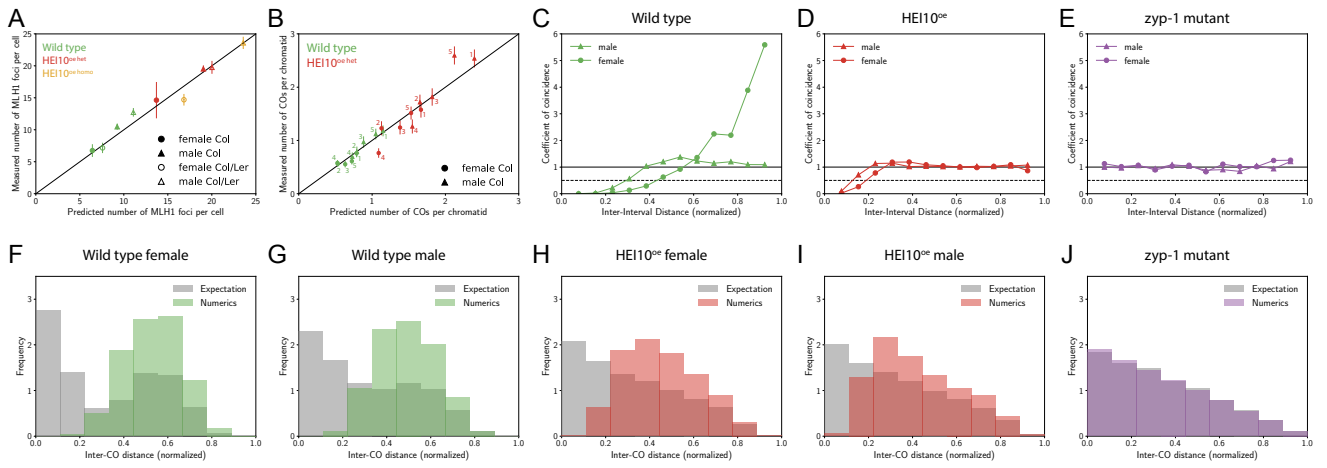

**Figure 6. A coarsening model for crossover designation explains the measured data**

(A) Number of MLH1 foci predicted by the model compared to the experimental measurements shown in Figure 1B. Error bars denote 90% confidence. (B) Number of COs per chromatid predicted by the model compared to the experimental measurements shown in Figure 1D. The respective chromatids are labeled and error bars denote 90% confidence. (C–E) Predicted coefficient of coincidence curves; compare to Figure 2G–J. (F–J) Predicted distributions of distances between two COs for chromosomes with exactly two COs; compare to Figure 2C–F. (A–J) Numerical details are given in the Methods. Mean and confidence intervals were determined from  $n=1000$  (except  $n=500$  in panel A) independent repetitions.
